# Supplementary material for: Serum concentrations of endothelial cell adhesion molecules and their shedding enzymes and early onset sepsis in newborns in Suriname
Source: PubMed Central journal article supplement — BMJ Paediatr Open. 2018 Oct 9;2(1):e000312. doi: 10.1136/bmjpo-2018-000312 (PMC6203012; doi:10.1136/bmjpo-2018-000312), 2018-10-09
Supplement: bmjpo-2018-000312.draft_revisions.pdf [file bmjpo-2018-000312.draft_revisions.pdf]

# BMJ Paediatrics Open

BMJ Paediatrics Open is committed to open peer review. As part of this commitment we make the peer review history of every article we publish publicly available.

When an article is published we post the peer reviewers' comments and the authors' responses online. We also post the versions of the paper that were used during peer review. These are the versions that the peer review comments apply to.

The versions of the paper that follow are the versions that were submitted during the peer review process. They are not the versions of record or the final published versions. They should not be cited or distributed as the published version of this manuscript.

BMJ Paediatrics Open is an open access journal and the full, final, typeset and author-corrected version of record of the manuscript is available on our site with no access controls, subscription charges or pay-per-view fees (<http://bmjpaedsopen.bmj.com>).

If you have any questions on BMJ Paediatrics Open's open peer review process please email [info.bmjpo@bmj.com](mailto:info.bmjpo@bmj.com)

**BMJ Paediatrics Open**

**High serum levels of endothelial cell adhesion molecules and their shedding enzymes do not discriminate between early onset sepsis and healthy newborns in Suriname.**

|                               |                                                                                                                                                                                                                                                                                                                         |
|-------------------------------|-------------------------------------------------------------------------------------------------------------------------------------------------------------------------------------------------------------------------------------------------------------------------------------------------------------------------|
| Journal:                      | <i>BMJ Paediatrics Open</i>                                                                                                                                                                                                                                                                                             |
| Manuscript ID                 | bmjpo-2018-000312                                                                                                                                                                                                                                                                                                       |
| Article Type:                 | Original article                                                                                                                                                                                                                                                                                                        |
| Date Submitted by the Author: | 16-May-2018                                                                                                                                                                                                                                                                                                             |
| Complete List of Authors:     | Zonneveld, Rens; University Medical Center Groningen, Jongman, Rianne; University Medical Center Groningen Juliana, Amadu; Academic Hospital Paramaribo, Pediatrics Molema, Grietje; University Medical Center Groningen Meurs, Matijs; University Medical Center Groningen Plötz, Frans; Tergooi Hospitals, Pediatrics |
| Keywords:                     | Neonatology, Infectious Diseases                                                                                                                                                                                                                                                                                        |
|                               |                                                                                                                                                                                                                                                                                                                         |

SCHOLARONE™  
Manuscripts

1  
2  
3 1  
4 2 **High serum levels of endothelial cell adhesion molecules and their shedding enzymes do**  
5 3 **not discriminate between early onset sepsis and healthy newborns in Suriname.**  
6 4  
7 5  
8 6

9 7 Rens Zonneveld, MD (1,2), Rianne M. Jongman, MSc (1,3,4), Amadu Juliana, MD (2),  
10 8 Grietje Molema, PhD (1), Matijs van Meurs, MD PhD (1,3), Frans B. Plötz, MD PhD (5)  
11 9  
12 10  
13 11

14 12 (1) Department of Pathology and Medical Biology, University Medical Center Groningen,  
15 13 University of Groningen, Groningen, The Netherlands; (2) Academic Pediatric Center  
16 14 Suriname, Academic Hospital Paramaribo, Paramaribo, Suriname; (3) Department of Critical  
17 15 Care and (4) Anesthesiology, University Medical Center Groningen, University of Groningen,  
18 16 Groningen, The Netherlands; (5) Department of Pediatrics, Tergooi Hospitals, Blaricum, The  
19 17 Netherlands.  
20 18  
21 19  
22 20  
23 21  
24 22  
25 23  
26 24  
27 25  
28 26  
29 27  
30 28  
31 29  
32 30  
33 31  
34 32  
35 33  
36 34  
37 35  
38 36  
39 37  
40 38  
41 39  
42 40  
43 41  
44 42  
45 43  
46 44  
47 45  
48 46  
49 47  
50 48  
51 49  
52 50  
53 51  
54 52  
55 53  
56 54  
57 55  
58 56  
59 57  
60 58

32 19 **Correspondence**

33 20 Rens Zonneveld, MD

34 21 Department of Pathology and Medical Biology

35 22 University Medical Center Groningen, University of Groningen

36 23 Hanzeplein 1, 9713 GZ Groningen, The Netherlands

37 24 Telephone: +31-50-3610115

38 25 Fax: +31-50-3619911

39 26 Email: rens.zonneveld@gmail.com  
40 27  
41 28  
42 29  
43 30  
44 31  
45 32  
46 33  
47 34  
48 35  
49 36  
50 37  
51 38  
52 39  
53 40  
54 41  
55 42  
56 43  
57 44  
58 45  
59 46  
60 47

28 **Short title:** Adhesion molecule shedding in Surinamese newborns

29 **Funding source:** The Thrasher Research Fund (TRF13064) and Tergooi Hospitals, Blaricum,  
30 The Netherlands.

1  
2  
3 31 **What is already known on this topic?**  
4

- 5 32 • Sepsis is associated with an Angiotensin (Ang)-1 and Ang-2 serum level disbalance  
6  
7 33 and increased shedding of soluble endothelial adhesion molecules (sCAMs).  
8  
9 34 • Recently, we established an association of the Ang-1/Ang-2 disbalance with blood  
10  
11 35 culture positive early onset sepsis (EOS) in newborns.  
12

13  
14 36 **What this study adds?**  
15

- 16 37 • The Ang-1/Ang-2 disbalance in blood culture positive EOS is not paralleled by  
17  
18 38 increased levels of sCAMs and their sheddases.  
19  
20 39 • Levels of sCAMs and their sheddases are high after birth and do not discriminate EOS  
21  
22 40 from healthy newborns.  
23  
24  
25 41  
26  
27 42  
28  
29 43  
30  
31 44  
32  
33 45  
34  
35 46  
36  
37 47  
38  
39 48  
40  
41 49  
42  
43 50  
44  
45 51  
46  
47 52  
48  
49 53  
50  
51 54  
52  
53 55  
54  
55  
56  
57  
58  
59  
60

1  
2  
3 56 **ABSTRACT**

4  
5 57 **Background:** Early Onset Sepsis (EOS) is defined as onset of sepsis within 72 hours after  
6  
7 58 birth. Leukocyte-endothelial interactions play a pivotal part in EOS pathophysiology.

8  
9 59 Endothelial cell adhesion molecules orchestrate these interactions and their soluble isoforms  
10  
11 60 (sCAMs) are released into the vasculature by enzymes called sheddases.

12  
13 61 **Purpose:** This study was undertaken to explore further the pathophysiology of EOS and to  
14  
15 62 investigate the potential of sCAM and their sheddases as potential biomarkers for EOS.

16  
17 63 **Methods:** Soluble CAMs sP-selectin, sE-selectin, vascular cell adhesion molecule-1  
18  
19 64 (sVCAM-1), intercellular adhesion molecule-1 (sICAM-1) and platelet and endothelial cell  
20  
21 65 adhesion molecule-1 (sPECAM-1), sheddases matrix metalloproteinase-9 (MMP-9) and  
22  
23 66 neutrophil elastase (NE), and sheddase antagonist tissue-inhibitor of metalloproteinases-1  
24  
25 67 (TIMP-1) were measured simultaneously in serum of 71 Surinamese newborns suspected of  
26  
27 68 EOS and 20 healthy newborns, all included within 72 hours after birth.

28  
29 69 **Results:** Six (8.5%) newborns had a positive blood culture. At start of antibiotic treatment  
30  
31 70 and after 48-72 hours no differences were found in levels of sCAMs and sheddases between  
32  
33 71 blood culture positive EOS and controls.

34  
35 72 **Conclusions:** Our data indicate that endothelial CAM shedding is not increased in EOS and  
36  
37 73 that levels of sCAMs and sheddases remain unchanged in early life in newborns, suggesting  
38  
39 74 not a role in the pathophysiology of EOS. Therefore, these markers have limited clinical  
40  
41 75 utility as biomarkers for EOS.

42  
43  
44  
45  
46 76

47  
48 77 **Keywords:** newborns; early onset sepsis; adhesion molecules; shedding; Suriname.  
49  
50  
51  
52  
53  
54  
55  
56  
57  
58  
59  
60

## 78 INTRODUCTION

79 Early onset sepsis (EOS) in newborns within 72 hours after birth remains a clinical challenge  
80 with high morbidity and mortality [1-3]. The majority of global neonatal deaths due to EOS  
81 occur in developing countries [4]. The diagnosis of EOS is complicated, resulting in late  
82 recognition, or overtreatment of newborns with antibiotics. These dilemmas arise because the  
83 pathophysiology of EOS is poorly understood.

84 A hallmark of sepsis pathophysiology is endothelial cell activation followed by  
85 leukocyte recruitment into tissues [5]. The current model describes the occurrence of a shift in  
86 balance in Tie2 receptor ligands Angiopoietin (Ang)-1 and Ang-2 affecting endothelial  
87 integrity, and increased expression of endothelial cell adhesion molecules, in particular P-  
88 selectin, E-selectin, vascular cell adhesion molecule (VCAM-1), and intercellular adhesion  
89 molecule (ICAM-1) to facilitate this recruitment [6,7]. These endothelial cell adhesion  
90 molecules orchestrate leukocyte rolling on, adhesion to, and diapedesis across the  
91 endothelium [7,8]. Also, platelet and endothelial cell adhesion molecule (PECAM-1),  
92 expressed at endothelial cell junctions has a function in facilitating paracellular transmigration  
93 of leukocytes across the endothelium [9]. After intravenous administration of endotoxin in  
94 healthy adults as a sepsis model, peak levels of Ang-2 prelude the release of soluble isoforms  
95 of cell adhesion molecules (sCAMs) into the systemic circulation [10]. Endothelial cell  
96 adhesion molecules are released through ectodomain shedding by enzymes called sheddases,  
97 in particular matrix metalloproteinase-9 (MMP-9) and neutrophil elastase, released from  
98 granules in neutrophils [7,11]. Both MMP-9 and neutrophil elastase prepare the extracellular  
99 matrix for transmigration of leukocytes into inflammatory sites [12]. MMP-9 activity is  
100 balanced by sheddase antagonist tissue-inhibitor of metalloproteinases-1 (TIMP-1) [12-14].

101 Recently, we showed in a cohort of near term and term Surinamese newborns that a  
102 systemic circulation dysbalance in Ang-2/Ang-1 levels was associated with blood culture

1  
2  
3 103 positive EOS [15]. This study was undertaken to examine if this dysbalance is paralleled by  
4  
5 104 increased levels of sCAMs and sheddases in this cohort of newborns with EOS to explore  
6  
7 105 further the pathophysiology of EOS and to investigate their potential as biomarkers for EOS.  
8  
9 106 We hypothesized that sCAMs and sheddases circulate at higher levels in blood culture  
10  
11 107 positive EOS in newborns and that they are useful as biomarkers for EOS.  
12

13  
14 108

## 15 109 **MATERIALS & METHODS**

### 16 110 **Study design, subjects and clinical protocol**

17  
18 111 For this study, we used a Surinamese cohort of 20 healthy newborns and 71 newborns with  
19  
20 112 suspected EOS from an earlier reported study (Supplemental Table 1, previously published)  
21  
22 113 [15]. All newborns were included between April 1 2015 and May 31 2016. Included were  
23  
24 114 newborns with a gestational age equal to or above 34 weeks in whom antibiotics were started  
25  
26 115 within the first 72 hours of life for suspected EOS. Informed consent was obtained from at  
27  
28 116 least one parent for the use of residual serum and clinical information. The study protocol was  
29  
30 117 made available on clinicaltrials.gov (NCT02486783) and was approved by the Surinamese  
31  
32 118 Medical Ethical Board (VG-021-14A) including permission of one parent.  
33  
34  
35

36  
37 119 The management of these patients was described before [15]. In short, healthy control  
38  
39 120 newborns and newborns suspected of EOS were included (t=0) within 72 hours after birth and  
40  
41 121 clinically reevaluated 48-72 hours later (t=48-72h). At t=0 and t=48-72h blood was drawn for  
42  
43 122 separation and storage of serum. This time point was chosen because the result of blood  
44  
45 123 culture became available. Controls were newborns without signs of infection receiving blood  
46  
47 124 draws for hyperbilirubinemia (n=20). Newborns with suspected EOS receiving treatment with  
48  
49 125 intravenous antibiotics were divided in two groups based on result from blood culturing:  
50  
51 126 blood culture negative EOS (n=65) and blood culture positive EOS (n=6).  
52  
53

54  
55 127  
56  
57  
58  
59  
60

## 128 **Sample collection, preparation and analysis**

129 At t=0 blood samples were collected during the insertion of a venous cannula and after 48-72  
130 hours of treatment with antibiotics a second blood sample was obtained using capillary  
131 collection. After clotting at room temperature and centrifugation at 2,300xg for 8 minutes the  
132 serum was harvested and the residual sample was stored at -80°C until further analysis.  
133 Measurement of sP-selectin, sE-selectin, sVCAM-1, sICAM-1, and sPECAM-1 was  
134 performed on serum samples using the Human Magnetic Bead Adhesion 6-plex panel  
135 performance assay (LHC0016M, Thermo Scientific, Waltham, MA USA) according to the  
136 manufacturer's instructions. ELISA was used on aliquots of the same samples for  
137 measurement of neutrophil elastase (HK319-02, Hycult Biotech, Uden, The Netherlands),  
138 MMP-9 (Quantikine DMP900, R&D systems, Minneapolis, MN USA), and TIMP-1  
139 (Quantikine DTM100, R&D systems), each according to the manufacturers' instructions. For  
140 each molecule, a standard curve was established via which concentrations in neonatal serum  
141 were determined. Levels below or above the linear part (for MMP-9 n=11 (7.7%) samples, for  
142 TIMP-1 n=2 (1.4%) samples, and for neutrophil elastase n=9 (6.3%) samples) of this standard  
143 curve were reported as the lowest or highest value of the standard curve, respectively. We  
144 measured intra-assay variation between plates used in the same assay by calculating  
145 coefficient of variation between levels of each molecule in samples from the same patient  
146 divided over those plates and accepted a maximum of 20%.

## 148 **Statistical analysis**

149 Categorical variables were presented as numbers and percentages with 95% CI and  
150 continuous variables, due to the nonparametric nature of the data, as median with interquartile  
151 range (IQR). The Chi-square test was used to compare categorical variables. A Mann-  
152 Whitney U test and Kruskal-Wallis test with Dunn's correction for multiple comparisons



1  
2  
3 153 were used for analysis of continuous variables. Because timing of inclusion after birth varied  
4  
5 154 between groups (Supplemental Table 1), we investigated whether postnatal sampling day (i.e.,  
6  
7 155 for both t=0 and t=48-72h between day 1 and 6 after birth) correlated with sCAM and  
8  
9 156 sheddase levels and calculated Spearman's *rho*. P-values <0.05 were considered statistically  
10  
11 157 significant. All analyses were done using Prism version 7.0a (Graphpad Software Inc., San  
12  
13 158 Diego, CA USA).

14  
15  
16 159

## 17 160 **RESULTS**

18  
19  
20 161 Demographic variables of the study cohort (n=91) are given in Supplemental Table 1. Blood  
21  
22 162 culture results revealed that 6 of 71 newborns with suspected EOS (8.5%; 95% CI 3.9-17.2)  
23  
24 163 had a positive blood culture with gram-negative pathogens *Klebsiella pneumoniae* (n=2),  
25  
26 164 *Enterobacter cloacae* (n=2) and *Escherichia coli* (n=2). One newborn had EOS due to a  
27  
28 165 spontaneous bacterial peritonitis. For n=4 others cause of EOS was unknown, but they  
29  
30 166 presented with neonatal jaundice (n=1), perinatal asphyxia (n=1), meconium aspiration (n=1),  
31  
32 167 and hypoglycaemia (n=1). We included 20 control newborns without signs of infection  
33  
34 168 receiving blood draws for hyperbilirubinemia.

35  
36  
37 169

### 38 170 **Serum levels of soluble endothelial cell adhesion molecules and their sheddases**

39  
40  
41 171 Serum samples (n=142) were available of all 91 newborns at t=0 and of 51 at t=48-72h. Due  
42  
43 172 to the limited amount of serum available, not all molecules could be measured in all samples.  
44  
45 173 Measurement of levels of MMP-9 and TIMP-1 was performed in n=90 and n=51 of newborns  
46  
47 174 at t=0 and t=48-72h, respectively. We were able to measure sCAMs and neutrophil elastase  
48  
49 175 levels in n=80 and n=36 newborns at t=0 and 48-72h, respectively.

50  
51  
52 176 We found no differences between median levels of sCAMs between blood culture  
53  
54 177 positive EOS, blood culture negative EOS, and control groups at either t=0 or t=48-72h

1  
2  
3 178 (Table 1). Median levels of sCAMs within a group did also not change between t=0 and t=48-  
4  
5 179 72h. Of all sCAMs only median levels of sP-selectin in pooled (n=115) samples correlated  
6  
7 180 negatively with later sampling day (*rho* -0.21; 95% CI -0.38 to -0.02; P=0.03). No differences  
8  
9 181 were found in median levels of MMP-9, TIMP-1, and neutrophil elastase between blood  
10  
11 182 culture positive EOS, blood culture negative EOS, and controls at either t=0 or t=48-72h.  
12  
13 183 Also, no differences between median levels of the sheddases within a group between t=0 and  
14  
15 184 t=48-72h were found. No correlation was found between levels of the sheddases and sampling  
16  
17  
18 185 day.  
19  
20 186

## 21 22 187 **DISCUSSION**

23  
24 188 In this study we investigated whether sCAMs and their sheddases circulate at higher levels in  
25  
26 189 newborns with blood culture positive EOS. We serially measured levels of sCAMs and  
27  
28 190 sheddases in a cohort of near and at term newborns. In contrast to our hypothesis, none of the  
29  
30 191 molecules showed any difference in serum levels between blood culture positive EOS, blood  
31  
32 192 culture negative EOS, and controls, neither at start of antibiotic treatment nor after 48-72  
33  
34 193 hours. These data indicate that levels of sCAM and sheddases are not associated in the  
35  
36 194 pathophysiology of EOS and have no clinical utility as early biomarkers for EOS in  
37  
38  
39 195 newborns.

40  
41 196 Previously, we found evidence for endothelial cell activation in blood culture positive  
42  
43 197 EOS in the same newborns used for this study, represented by a dysbalance in Ang-2/Ang-1  
44  
45 198 ratio [15]. Since the current data demonstrate that this dysbalance was not paralleled by  
46  
47 199 increased release of sCAM or sheddases in EOS we conclude that endothelial cell adhesion  
48  
49 200 molecule shedding is not or to a lesser extent involved in the pathophysiology of EOS. For  
50  
51 201 interpretation of our data we reviewed and summarized available data on sCAMs and  
52  
53  
54 202 sheddases in newborns with sepsis in Supplemental Table 2 [16-34]. Comparison of our  
55  
56  
57  
58  
59  
60

1  
2  
3 203 results with other existing data is complicated because of heterogenic make up of chosen  
4  
5 204 cohorts. Only one study reported a comparable cohort of near and at term newborns with  
6  
7 205 suspected EOS within 72 hours after birth, in whom increased levels of sICAM-1 and  
8  
9 206 neutrophil elastase levels were associated with blood culture positive EOS [19]. Other earlier  
10  
11 207 studies compared levels of sCAMs in heterogenic cohorts consisting of newborns with  
12  
13 208 different gestational and postnatal ages, either having EOS (based on varying definitions), or  
14  
15 209 sepsis after 72 hours after birth (i.e., late onset sepsis). This variation in inclusion criteria is an  
16  
17 210 important confounding factor in the interpretation of the observed levels in septic and healthy  
18  
19 211 newborns. Overall, our results are in line with these studies that show that clinical utility of  
20  
21 212 levels of sCAMs and sheddases in EOS is very limited.

22  
23  
24 213 In an earlier review by our group we pooled published data on sCAM levels in  
25  
26 214 newborns [7]. Soluble CAM levels in the current study corresponded well with levels  
27  
28 215 discussed in our review and those established in earlier studies in uninfected healthy  
29  
30 216 newborns with similar gestational and postnatal age [7, 23,24,29-32]. However, MMP-9,  
31  
32 217 TIMP-1, and neutrophil elastase levels were different and up to 4, 2, and 10-fold higher,  
33  
34 218 respectively, than those reported in earlier studies [17,18,21,22,25,30], which may have been  
35  
36 219 due to other methods used (see limitations). Furthermore, our earlier review and earlier data  
37  
38 220 indicated that significant age-related discrepancies exist in sCAM levels between newborns,  
39  
40 221 children and adults. As an example, in at term newborns sVCAM-1 concentrations in the first  
41  
42 222 postnatal week were almost twice the levels in healthy adults, and equally high compared to  
43  
44 223 septic adults, suggesting that sVCAM-1 levels start of high in early newborn life and then  
45  
46 224 decrease with increasing age [7,31]. In our study, levels of sCAMs and sheddases during the  
47  
48 225 first 6 days of life in our study remained stable for 7 out of analyzed 8 molecules, which was  
49  
50 226 in contrast with earlier work in healthy newborns showing that sE-selectin decreased, and  
51  
52 227 sICAM-1 and sVCAM-1 increased between day 1 and 5 after birth, while sPECAM-1 levels  
53  
54  
55  
56  
57  
58  
59  
60

1  
2  
3 228 did not change [29-32]. Even though some discrepancies with earlier reports exist, overall one  
4  
5 229 can conclude that these and our data indicate that levels of sCAMs and sheddases measured  
6  
7 230 within 72 hours after birth are high and do not discriminate between septic and healthy  
8  
9 231 newborns, which limits their use as biomarkers for early identification or exclusion of EOS.

10  
11 232 Our and pre-existing data suggest that overall high sCAM and sheddase levels in  
12  
13 233 newborns are the result of other perinatal factors than EOS. Several pathophysiological  
14  
15 234 processes may explain this premise. Birth may induce a 'pro-adhesive' state of the  
16  
17 235 endothelium leading to increased endothelial cell adhesion molecules expression on, and  
18  
19 236 shedding from, its surface. Additionally, the increase in overall leukocyte numbers and  
20  
21 237 inflammatory activation of subsets associated with human birth, which was shown to be  
22  
23 238 positively associated with increased perinatal stress [35-37], may cause higher intensity of  
24  
25 239 leukocyte-endothelial interactions and subsequent increases endothelial cell adhesion  
26  
27 240 molecules shedding. Aberrant adhesion of activated leukocytes to activated endothelium is  
28  
29 241 associated with endothelial dysfunction and increased vascular permeability [38,39].  
30  
31 242 Shedding of endothelial cell adhesion molecules may then result in prevention of aberrant  
32  
33 243 leukocyte adhesion on two complementary levels, namely 1) to lower endothelial cell  
34  
35 244 adhesion molecules density to prevent adhesion or promote de-adhesion of already adhering  
36  
37 245 leukocytes and 2) to release circulating sCAMs that act as 'decoy receptors' to capture  
38  
39 246 leukocytes in the vasculature to limit leukocyte-endothelial interactions [7,10]. Whether this  
40  
41 247 occurs in real life and what the contribution is to sCAM and sheddase levels in newborns  
42  
43 248 remains unknown and could be studied in neonatal animal models [40-42].

44  
45 249 Our study has some limitations. First, sample size at t=48-72h was relatively small due  
46  
47 250 to limited clinical need for additional blood draws in controls and death of patients. As a  
48  
49 251 result, logistic regression analysis of other factors, such as maternal perinatal factors or  
50  
51 252 method of birth, potentially influencing levels of sCAMs and sheddases, was precluded.  
52  
53  
54  
55  
56  
57  
58  
59  
60

1  
2  
3 253 Larger studies in countries such as Suriname, where the incidence of EOS is relatively high in  
4  
5 254 comparison to Western countries, are necessary and can contribute to better insight in the  
6  
7 255 vascular pathophysiology of EOS. Second, the use of serum in our study may have caused  
8  
9 256 release of stored pools of MMP-9, TIMP-1, and neutrophil elastase from disrupted leukocytes  
10  
11 257 during the clotting process, which could have accounted for higher levels of these molecules  
12  
13 258 than reported in earlier studies.

15 259 In conclusion, our data indicate that serum levels of sCAMs and sheddases are not  
16  
17 260 increased during EOS in Surinamese near and at term newborns. Other mechanisms, such as  
18  
19 261 perinatal stress during birth, may drive overall high levels in all newborns which precludes  
20  
21 262 discrimination between septic and healthy newborns based on levels of these molecules. For  
22  
23 263 these reasons sCAMs and sheddases studied have no utility as biomarkers for EOS.  
24  
25

26  
27 264

#### 28 265 **ABBREVIATIONS AND DEFINITIONS**

30  
31 266 EOS = Early onset sepsis

32  
33 267 ICAM-1 = Intercellular adhesion molecule-1

34  
35 268 VCAM-1= Vascular cell adhesion molecule-1

36  
37 269 PECAM-1= Platelet and endothelial cell adhesion molecule-1

38  
39 270 MMP-9 = Matrix metalloproteinase-9

40  
41 271 TIMP-1 = Tissue-inhibitor of metalloproteinases-1

42  
43  
44 272

#### 45 273 **ACKNOWLEDGEMENTS**

46  
47 274 The research in this study was supported by the Thrasher Research Fund (TRF13064) (R.

48  
49 275 Zonneveld) and Tergooi Hospitals, Blaricum, The Netherlands. The authors acknowledge the

50  
51 276 efforts of all employees of the Clinical Laboratory of the Academic Hospital Paramaribo and  
52  
53  
54  
55  
56  
57  
58  
59  
60

1  
2  
3 277 the Central Laboratory of Suriname, Paramaribo, Suriname, for assistance with sample  
4  
5 278 storage, handling and transport.

6  
7 279

8  
9 280 **CONFLICTS OF INTEREST**

10  
11 281 The authors declare no conflicts of interest

12  
13 282

14  
15 283 **REFERENCES**

- 16  
17  
18 284 1. Van Herk W, Stocker M, van Rossum AM. Recognising early onset neonatal sepsis:  
19  
20 285 an essential step in appropriate antimicrobial use. *J Infect* 2016, 72:S77-82.
- 21  
22 286 2. Simonson KA, Anderson-Berry AL, Delair SF, Davies HD. Early-onset neonatal  
23  
24 287 sepsis. *Clin Microbiol Rev* 2014, 27(1):21-47.
- 25  
26 288 3. Stoll BJ. Early-onset neonatal sepsis: a continuing problem in need of novel  
27  
28 289 prevention strategies. *Pediatrics* 2016, 138(6): e20163038.
- 29  
30 290 4. Lawn JE, Cousens S, Zupan J; Lancet Neonatal Survival Steering Team. 4 million  
31  
32 291 neonatal deaths: when? Where? Why? *Lancet* 2005, 365(9462):891-900.
- 33  
34 292 5. Aird WC. The role of the endothelium in severe sepsis and multiple organ dysfunction  
35  
36 293 syndrome. *Blood* 2003, 101(10):3765-77.
- 37  
38 294 6. Fiedler U, Augustin HG. Angiopoietins: a link between angiogenesis and  
39  
40 295 inflammation *Trends Immunol* 2006, 27:552-558.
- 41  
42 296 7. Zonneveld R, Martinelli R, Zonneveld R, Martinelli R, Shapiro NI, Kuijpers TW,  
43  
44 297 Plötz FB, Carman CV. Soluble adhesion molecules as markers for sepsis and the  
45  
46 298 potential pathophysiological discrepancy in neonates, children and adults. *Crit Care*  
47  
48 299 2014, 18;18(1):204.
- 49  
50 300 8. Ley K, Laudanna C, Cybulsky MI, Nourshargh S. Getting to the site of inflammation:  
51  
52 301 the leukocyte adhesion cascade updated. *Nat Rev Immunol* 2007, 7(9):678-89.
- 53  
54  
55  
56  
57  
58  
59  
60

- 1  
2  
3 302 9. Privratsky JR, Newman PJ. PECAM-1: regulator of endothelial junctional integrity.  
4  
5 303 Cell Tissue Res 2014, 355(3): 607–619.  
6  
7 304 10. Kümpers P, van Meurs M, David S, Molema G, Bijzet J, Lukasz A, Biertz F, Haller  
8  
9 305 H, Zijlstra JG. Time course of angiopoietin-2 release during experimental human  
10  
11 306 endotoxemia and sepsis. Crit Care 2009, 13(3):R64.  
12  
13 307 11. Garton KJ, Gough PJ, Raines EW. Emerging roles for ectodomain shedding in the  
14  
15 308 regulation of inflammatory responses. J Leukoc Biol 2006, 79(6):1105-16.  
16  
17 309 12. Elkington PTG, O’Kane CM, Friedland JS. The paradox of matrix metalloproteinases  
18  
19 310 in infectious disease. Clin Exp Immunol 2005, 142(1): 12-20.  
20  
21 311 13. Brew K, Nagase H. The tissue inhibitors of metalloproteinases (TIMPs): An ancient  
22  
23 312 family with structural and functional diversity. Biochim Biophys Acta 2010, 1803(1):  
24  
25 313 55–71.  
26  
27 314 14. Lorente L, Martín MM, Solé-Violán J, Blanquer J, Labarta L, Díaz C, Borreguero-  
28  
29 315 León JM, Orbe J, Rodríguez JA, Jiménez A, Páramo JA. Association of sepsis-related  
30  
31 316 mortality with early increase of TIMP-1/MMP-9 ratio. PLoS One 2014,  
32  
33 317 11;9(4):e94318.  
34  
35 318 15. Zonneveld R, Jongman R, Juliana A, Zijlmans W, Plötz FB, Molema G, Van Meurs  
36  
37 319 M. Low Serum Angiopoietin-1, high Angiopoietin-2, and high Ang-2/Ang-1 Protein  
38  
39 320 Ratio are Associated with Early Onset Sepsis in Surinamese Newborns. Shock 2017  
40  
41 321 16. Fattah MA, Omer AF, Asaif S, Manlulu R, Karar T, Ahmed A, Aljada A, Saleh AM,  
42  
43 322 Qureshi S, Nasr A. Utility of cytokine, adhesion molecule and acute phase proteins in  
44  
45 323 early diagnosis of neonatal sepsis. J Nat Sci Biol Med 2017, 8(1):32-39.  
46  
47 324 17. Weitkamp JH, Guthrie SO, Wong HR, Moldawer LL, Baker HV, Wynn JL.  
48  
49 325 Histological chorioamnionitis shapes the neonatal transcriptomic immune response.  
50  
51 326 Early Hum Dev 2016, 98:1-6.  
52  
53  
54  
55  
56  
57  
58  
59  
60



- 1  
2  
3 327 18. Wynn JL, Guthrie SO, Wong HR, Lahni P, Ungaro R, Lopez MC, Baker HV,  
4  
5 328 Moldawer LL. Postnatal Age Is a Critical Determinant of the Neonatal Host Response  
6  
7 329 to Sepsis. *Mol Med*. 2015;21:496–504  
8  
9 330 19. Sugitharini V, Prema A, Berla Thangam E. Inflammatory mediators of systemic  
10  
11 331 inflammation in neonatal sepsis. *Inflamm Res* 2013, 62(12):1025-34.  
12  
13 332 20. Edgar JDM, Gabriel V, Gallimore JR, McMillan SA, Grant J. A prospective study of  
14  
15 333 the sensitivity, specificity and diagnostic performance of soluble intercellular adhesion  
16  
17 334 molecule 1, highly sensitive C-reactive protein, soluble E-selectin and serum amyloid  
18  
19 335 A in the diagnosis of neonatal infection. *BMC Pediatr* 2010, 16:10–22.  
20  
21  
22 336 21. Fukunaga S, Ichiyama T, Maeba S, Okuda M, Nakata M, Sugino N, Furukawa S.  
23  
24 337 MMP-9 and TIMP-1 in the cord blood of premature infants developing BPD. *Ped*  
25  
26 338 *Pulm* 2009, 44: 267-272.  
27  
28 339 22. Sunagawa S, Ichiyama T, Honda R, Fukunaga S, Maeba S, Furukawa S. Matrix  
29  
30 340 metalloproteinase-9 and tissue inhibitor of metalloproteinase-1 in perinatal asphyxia.  
31  
32 341 *Brain Dev* 2009, 31(8):588-93.  
33  
34 342 23. Figueras-Aloy J, Gómez-López L, Rodríguez-Miguélez JM, Salvia-Roiges MD,  
35  
36 343 Jordán-García I, Ferrer-Codina I, Carbonell-Estrany X, Jiménez-González R. Serum  
37  
38 344 soluble ICAM-1, VCAM-1, L-selectin and P-selectin levels as markers of infection  
39  
40 345 and their relation to clinical severity in neonatal sepsis. *Am J Perinat* 2007, 24:331–  
41  
42 346 338.  
43  
44 347 24. Sitaru AG, Speer CP, Holzhauser S, Oberfell A, Walter U, Grossmann R.  
45  
46 348 Chorioamnionitis is associated with increased CD40L expression on cord blood  
47  
48 349 platelets. *Thromb Haemost* 2005, 94(6):1219-23.  
49  
50  
51  
52  
53  
54  
55  
56  
57  
58  
59  
60



- 1  
2  
3 350 25. Schulz CG, Sawicki G, Lemke RP, Roeten BM, Schulz R, Cheung PY. MMP-2 and  
4  
5 351 MMP-9 and their tissue inhibitors in the plasma of preterm and term neonates. *Pediatr*  
6  
7 352 *Res* 2004, 55(5):794-801.
- 8  
9 353 26. Edgar JDM, Gabriel V, Craig A, Wheeler D, Thomas M, Grant J. A low serum  
10  
11 354 sICAM-1 level may assist in the exclusion of neonatal infection. *Biol Neonate* 2002,  
12  
13 355 81:105–108.
- 14  
15 356 27. Apostolou M, Dimitriou H, Kaleyias J, Perdikogianni C, Stiakaki E, Costalos C,  
16  
17 357 Kalmanti MC. Levels of soluble ICAM-1 in premature and full-term neonates with  
18  
19 358 infection. *Mediators Inflamm* 2002, 11:95–98.
- 20  
21 359 28. Dollner H, Vatten L, Austgulen R. Early diagnostic markers for neonatal sepsis:  
22  
23 360 comparing C-reactive protein, interleukin-6, soluble tumor necrosis factor receptors  
24  
25 361 and soluble adhesion molecules. *J Clin Epidemiol* 2001, 54:1251–1257.
- 26  
27 362 29. Malamitsi-Puchner A, Tziotis J, Mastorakos G, Protonotariou E, Creatsas G. Adhesion  
28  
29 363 molecules in early neonatal life. *Biol Neonate* 2000, 78(1):65-7.
- 30  
31 364 30. Giannaki G, Rizos D, Xyni K, Sarandakou A, Protonotariou E, Phocas I, Creatsas G.  
32  
33 365 Serum soluble E-and L-selectin in the very early neonatal period. *Early Hum Develop*  
34  
35 366 2000, 60:149–155.
- 36  
37 367 31. Giannaki G, Xyni K, Rizos D, Phocas I. Comparative study of serum soluble VCAM-  
38  
39 368 1 and ICAM-1 levels in the early neonatal period. *Acta Paediatr* 1999, 88(12):1413-4.
- 40  
41 369 32. Phocas I, Sarandakou A, Giannaki G, Malamitsi-Puchner A, Rizos D, Zourlas PA.  
42  
43 370 Soluble intercellular adhesion molecule-1 in newborn infants. *Eur J Pediatr* 1998,  
44  
45 371 157(2):153-6.
- 46  
47 372 33. Berner R, Niemeyer CM, Leititis JU, Funke A, Schwab C, Rau U, Richter K, Tawfeek  
48  
49 373 MS, Clad A, Brandis M. Plasma levels and gene expression of granulocyte colony-  
50  
51 374 stimulating factor, tumor necrosis factor-(alpha), interleukin (IL)-1(beta), IL-6, IL-8,

- 1  
2  
3 375 and soluble intercellular adhesion molecule-1 in neonatal early onset sepsis. *Pediatr*  
4  
5 376 *Res* 1998, 44:469–477.
- 6  
7 377 34. Austgulen R, Arntzen KJ, Haereid PE, Aag S, Døllner H. Infections in neonates  
8  
9 378 delivered at term are associated with increased serum levels of ICAM-1 and E-  
10  
11 379 selectin. *Acta Paediatr* 1997, 86:274–280.
- 12  
13 380 35. Lim FT, van Winsen L, Willemze R, Kanhai HH, Falkenburg JH. Influence of  
14  
15 381 delivery on numbers of leukocytes, leukocyte subpopulations, and hematopoietic  
16  
17 382 progenitor cells in human umbilical cord blood. *Blood Cells* 1994,20(2-3):547-58;  
18  
19 383 discussion 558-9.
- 20  
21  
22 384 36. Lim FT, Scherjon SA, van Beckhoven JM, Brand A, Kanhai HH, Hermans JM,  
23  
24 385 Falkenburg JH. Association of stress during delivery with increased numbers of  
25  
26 386 nucleated cells and hematopoietic progenitor cells in umbilical cord blood. *Am J*  
27  
28 387 *Obstet Gynecol* 2000, 183(5):1144-52
- 29  
30  
31 388 37. Duijts L, Bakker-Jonges LE, Labout JA, Jaddoe VW, Hofman A, Steegers EA, Van  
32  
33 389 Dongen JJ, Hooijkaas H, Moll HA. Perinatal stress influences lymphocyte subset  
34  
35 390 counts in neonates. The generation R study. *Pediatr Res* 2008, 63(3):292-8.
- 36  
37 391 38. Beyrau M, Bodkin JV, Nourshargh S. Neutrophil heterogeneity in health and disease:  
38  
39 392 a revitalized avenue in inflammation and immunity. *Open Biol* 2012, 2(11):120134.
- 40  
41 393 39. Brown KA, Brain SD, Pearson JD, Edgeworth JD, Lewis SM, Treacher DF.  
42  
43 394 Neutrophils in development of multiple organ failure in sepsis. *Lancet* 2006,  
44  
45 395 368(9530):157-69.
- 46  
47  
48 396 40. Shapiro NI, Yano K, Sorasaki M, Fischer C, Shih SC, Aird WC. Skin biopsies  
49  
50 397 demonstrate site-specific endothelial activation in mouse models of sepsis. *J Vasc Res*  
51  
52 398 2009, 46(5):495-502.
- 53  
54  
55  
56  
57  
58  
59  
60

- 1  
2  
3 399 41. Csonka K, Vadovics M, Marton A, Vágvölgyi C, Zajta E, Tóth A, Tóth R, Vizler C,  
4  
5 400 Tiszlavicz L, Mora-Montes HM, Gácsér A. Investigation of OCH1 in the Virulence of  
6  
7 401 *Candida parapsilosis* Using a New Neonatal Mouse Model. *Front Microbiol* 2017,  
8  
9 402 8:1197.  
10  
11 403 42. Molina-Berrios A, Campos-Estrada C, Lapier M, Duaso J, Kemmerling U, Galanti N,  
12  
13 404 Ferreira J, Morello A, López-Muñoz R, Maya JD. Protection of vascular endothelium  
14  
15 405 by aspirin in a murine model of chronic Chagas' disease. *Parasitol Res* 2013,  
16  
17 406 112(7):2731-9.  
18  
19  
20  
21  
22  
23  
24  
25  
26  
27  
28  
29  
30  
31  
32  
33  
34  
35  
36  
37  
38  
39  
40  
41  
42  
43  
44  
45  
46  
47  
48  
49  
50  
51  
52  
53  
54  
55  
56  
57  
58  
59  
60

1  
2  
3 407 **FIGURE LEGENDS**

4  
5 408 **Figure 1.**

6  
7 409 **Circulating levels of endothelial adhesion molecules sP-selectin, sE-selectin, sVCAM-1,**  
8  
9 410 **sICAM-1, and sPECAM-1 in Surinamese newborns. A: sP-selectin B: sE-selectin C:**  
10  
11 411 **soluble vascular cell adhesion molecule-1 (sVCAM-1); D: soluble intercellular adhesion**  
12  
13 412 **molecule-1 (sICAM-1); E: soluble platelet and endothelial cell adhesion molecule-1**  
14  
15 413 **(sPECAM-1). Data report levels in serum sampled at t=0 (white bars) and t=48-72h (grey**  
16  
17 414 **bars) and are analyzed with a Kruskal-Wallis test between all groups at t=0 ( $P_{t=0}$ ) and at t=48-**  
18  
19 415 **72 ( $P_{t=48-72}$ ).  $P<0.05$  is considered statistically significant. Bars represent median values and**  
20  
21 416 **error bars interquartile range.**

22  
23  
24 417

25  
26 418 **Figure 2. Circulating levels of MMP-9 and TIMP-1, and TIMP-1/MMP-9 ratios in**  
27  
28 419 **Surinamese newborns. A: Matrix metalloproteinase-9 (MMP-9); B: Tissue inhibitor of**  
29  
30 420 **metalloproteinase (TIMP-1); C: TIMP-1/MMP-9 ratios. Data report levels in serum sampled**  
31  
32 421 **at t=0 (white bars) and t=48-72h (grey bars) and are analyzed with a Kruskal-Wallis test**  
33  
34 422 **between all groups at t=0 ( $P_{t=0}$ ) and at t=48-72 ( $P_{t=48-72}$ ).  $P<0.05$  is considered statistically**  
35  
36 423 **significant. Bars represent median values and error bars interquartile range.**

37  
38  
39 424

40  
41 425 **Figure 3. Circulating levels of neutrophil elastase in Surinamese newborns. Data report**  
42  
43 426 **levels in serum sampled at t=0 (white bars) and t=48-72h (grey bars) and are analyzed with a**  
44  
45 427 **Kruskal-Wallis test between all groups at t=0 ( $P_{t=0}$ ) and at t=48-72 ( $P_{t=48-72}$ ).  $P<0.05$  is**  
46  
47 428 **considered statistically significant. Bars represent median values and error bars interquartile**  
48  
49 429 **range.**

50  
51  
52  
53  
54  
55  
56  
57  
58  
59  
60

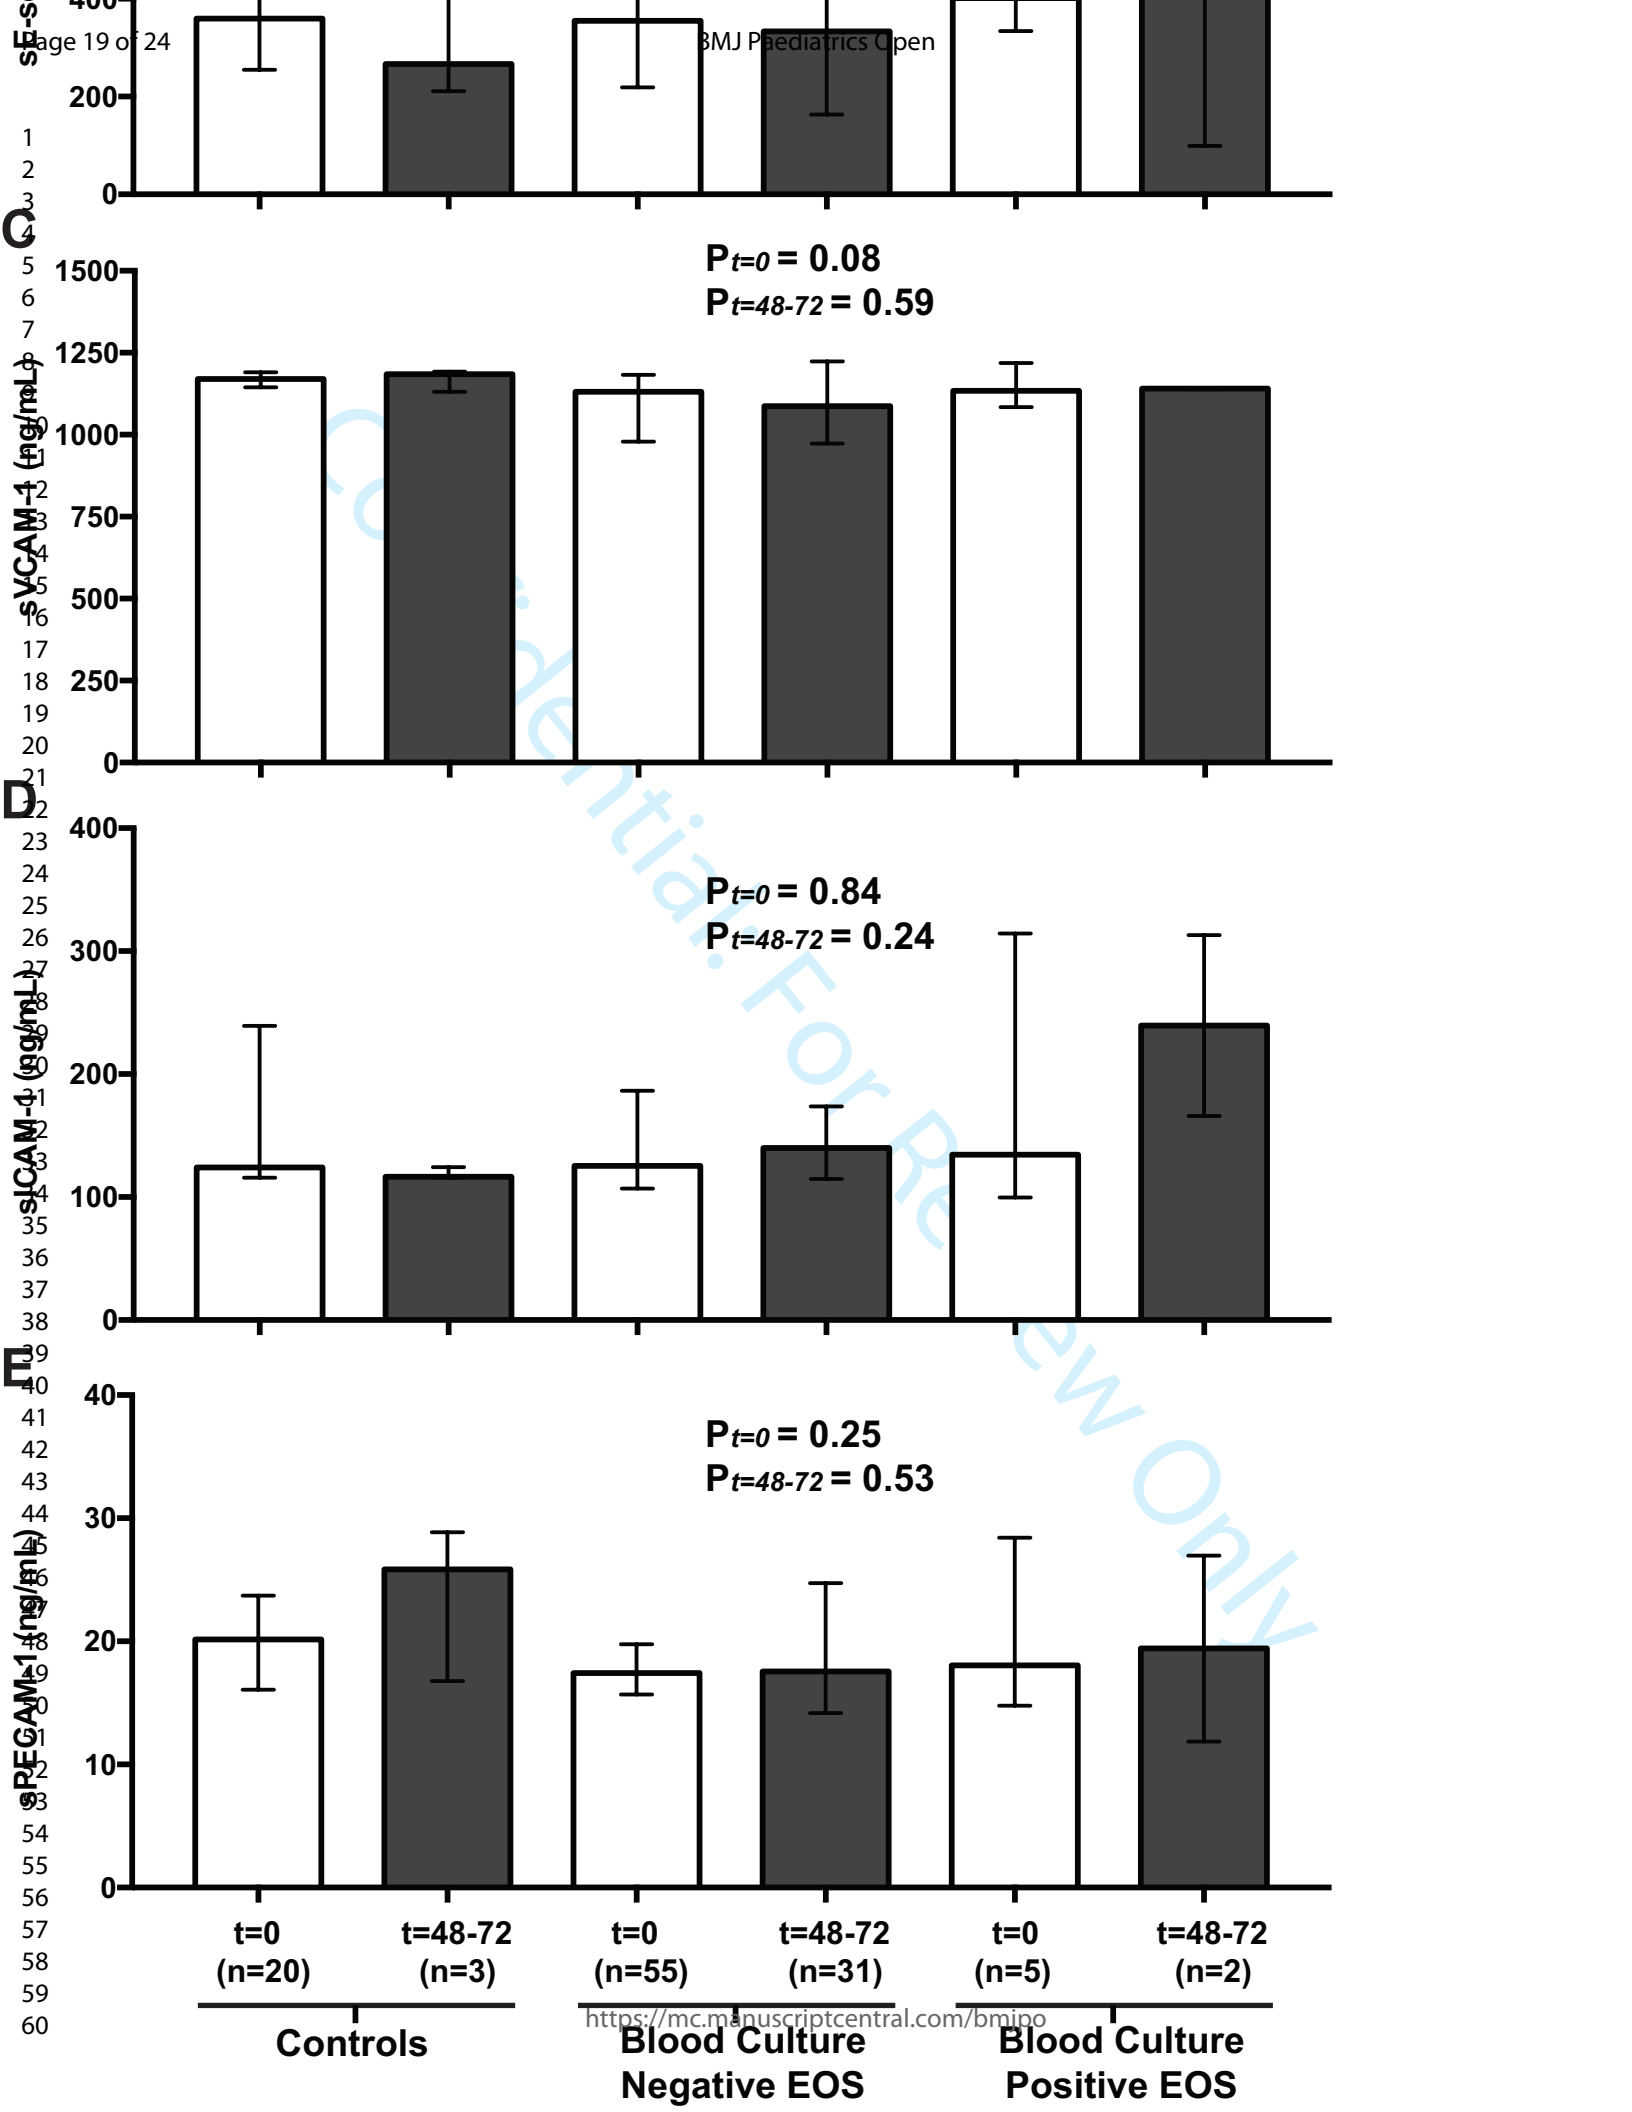

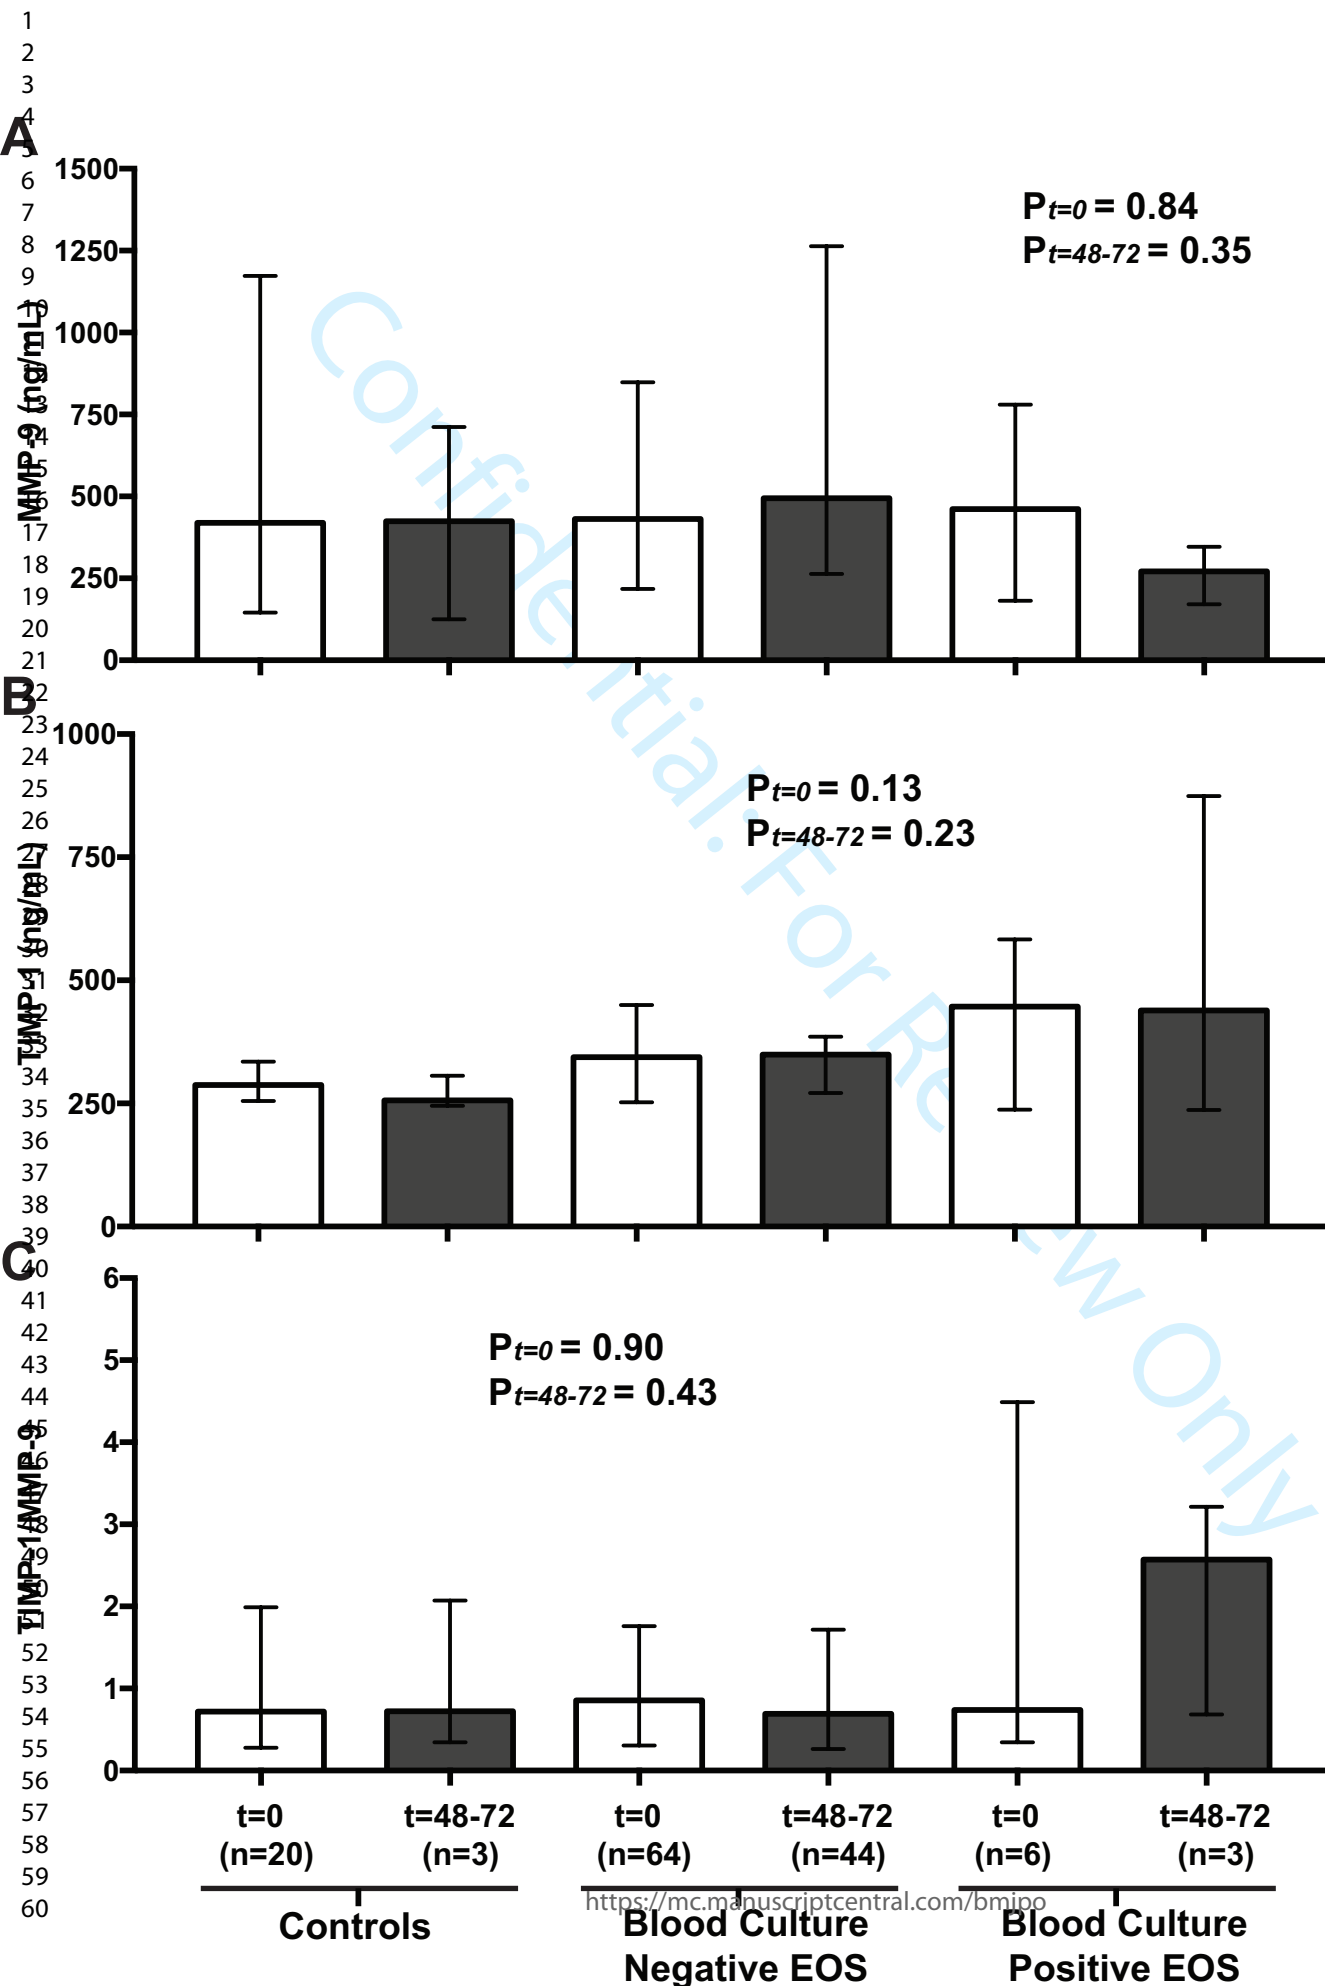

1  
2  
3  
4  
5  
6  
7  
8  
9  
10  
11  
12  
13  
14  
15  
16  
17  
18  
19  
20  
21  
22  
23  
24  
25  
26  
27  
28  
29  
30  
31  
32  
33  
34  
35  
36  
37  
38  
39  
40  
41  
42  
43  
44  
45  
46  
47  
48  
49  
50  
51  
52  
53  
54  
55  
56  
57  
58  
59  
60

Confidential: For Review Only

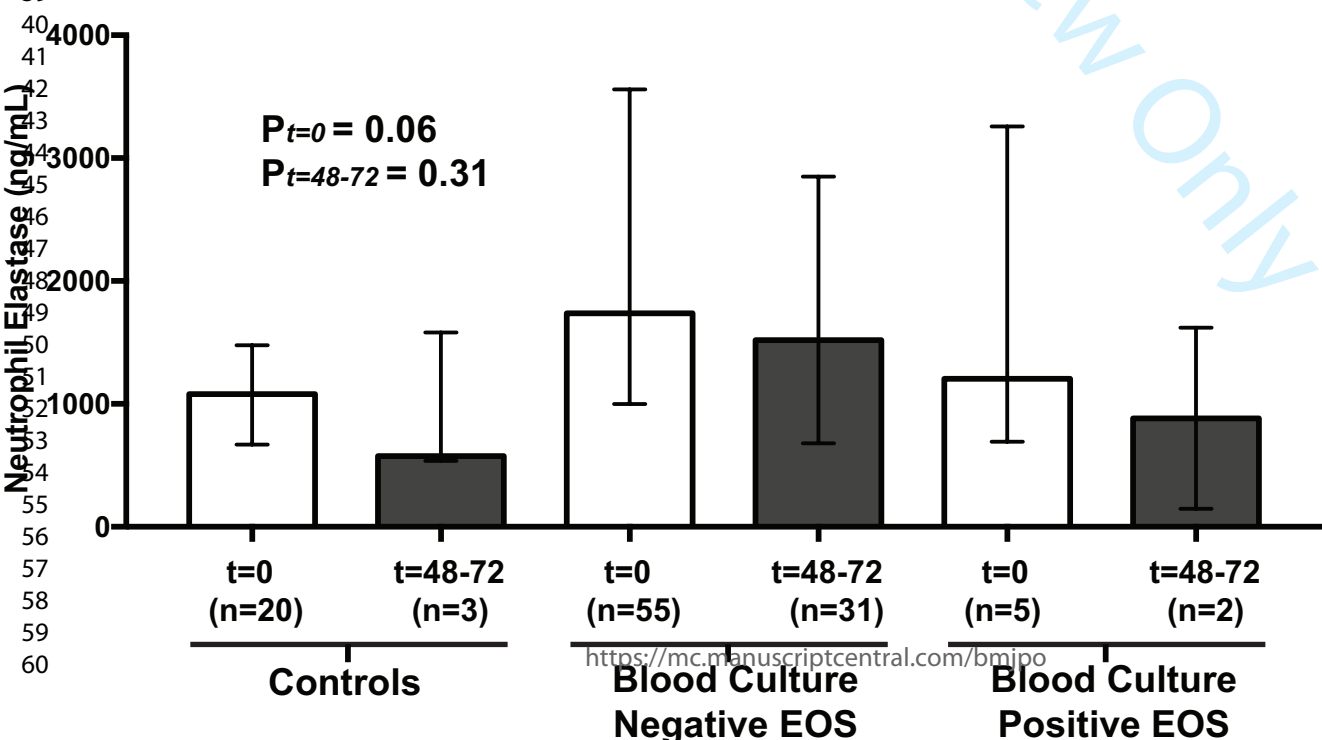

**Supplemental Table 1: Descriptive statistics of the study group (n=91)**

|                                           |                               | Controls (n=20) | Early Onset Sepsis            |                              | P-value |
|-------------------------------------------|-------------------------------|-----------------|-------------------------------|------------------------------|---------|
|                                           |                               |                 | Blood Culture Negative (n=65) | Blood Culture Positive (n=6) |         |
| <b>Pregnancy, n (%)</b>                   | Complications <sup>a</sup>    | 3 (15)          | 16 (25)                       | 1 (17)                       | 0.63    |
|                                           | Chorioamnionitis <sup>b</sup> | 0               | 18 (28)                       | 0                            |         |
| <b>Mode of delivery, n (%)</b>            | Vaginal                       | 12 (60)         | 46 (75)                       | 4 (67)                       | 0.54    |
|                                           | Caesarean                     | 8 (40)          | 19 (25)                       | 2 (33)                       |         |
| <b>Sex, n (%)</b>                         | Male                          | 9 (45)          | 29 (45)                       | 5 (83)                       | 0.19    |
|                                           | Female                        | 11 (55)         | 36 (55)                       | 1 (17)                       |         |
| <b>Ethnicity, n (%)</b>                   | Maroon and Creole             | 12 (60)         | 44 (68)                       | 4 (67)                       | 0.61    |
|                                           | Hindo-Surinamese              | 3 (15)          | 14 (21)                       | 1 (17)                       |         |
|                                           | Other <sup>c</sup>            | 5 (25)          | 7 (11)                        | 1 (17)                       |         |
| <b>Gestational age, n (%) (weeks)</b>     | 34-37                         | 1 (5)           | 22 (34)                       | 0                            | 0.06    |
|                                           | 37-40                         | 14 (70)         | 30 (46)                       | 4 (67)                       |         |
|                                           | ≥40                           | 5 (25)          | 13 (20)                       | 2 (33)                       |         |
| <b>Apgar score, n (%)</b>                 | <5                            | 0               | 5 (8)                         | 2 (33)                       | 0.03    |
| <b>Birth weight, Median (IQR) (grams)</b> |                               | 3130 (700)      | 2840 (835)                    | 3500 (906)                   | 0.02    |
| <b>Age at presentation, n (%) (hours)</b> | <24                           | 4 (20)          | 43 (66)                       | 2 (33)                       | <0.01   |
|                                           | 24-48                         | 7 (35)          | 13 (20)                       | 1 (17)                       |         |
|                                           | 48-72                         | 9 (45)          | 9 (14)                        | 3 (50)                       |         |
| <b>Clinical course (at 48-72h), n (%)</b> | CPAP                          | 0               | 9 (14)                        | 0                            | <0.001  |
|                                           | Mechanical Ventilation        | 0               | 7 (11)                        | 2 (33)                       |         |
|                                           | Cardiotonics                  | 0               | 5 (8)                         | 1 (17)                       |         |
|                                           | Mortality                     | 0               | 3 (5)                         | 2 (33)                       |         |

This table was previously published in reference 15. CPAP = continuous positive airway pressure; N/A = not applicable.

<sup>a</sup> Presence of pregnancy-induced hypertension, preeclampsia or diabetes mellitus;

<sup>b</sup> Defined as intrapartum fever or administration of antibiotics;

<sup>c</sup> Includes: Javanese, Chinese, Caucasian and Amerindian.



**Supplemental Table 2: Studies reporting levels of endothelial cell adhesion molecules and shedding enzymes in newborns**

| Study (ref.), year            | CAM or shedding enzyme         | Cohort Characteristics | Gestational age (weeks) | Postnatal age  | Main Results                                          | Analysis Method         | Healthy (ng/mL) <sup>1</sup>                                                   | Septic (ng/mL) <sup>1</sup>                                                      |
|-------------------------------|--------------------------------|------------------------|-------------------------|----------------|-------------------------------------------------------|-------------------------|--------------------------------------------------------------------------------|----------------------------------------------------------------------------------|
| Fatah et al. (16), 2017       | sE-selectin                    | EOS and LOS            | NS                      | NS             | sE-selectin <b>elevated</b> in BCPS                   | ELISA                   | 148.9 ± 7.9                                                                    | 177.1 ± 3.5                                                                      |
| Weitkamp et al. (17), 2016    | MMP-9                          | EOS and LOS            | 25-36                   | < and ≥ 3 days | MMP-9 levels <b>lower</b> in BCPS                     | Multiplex bead assay    | NS                                                                             | NS                                                                               |
| Wynn et al. (18), 2015        | MMP-9                          | Chorioamnionitis       | 25-36                   | NS             | MMP-9 levels <b>lower</b> in chorioamnionitis         | Multiplex bead assay    | NS                                                                             | NS                                                                               |
| Sugitharini et al. (19), 2013 | sICAM-1, NE                    | EOS                    | 34-42                   | 0-72 hours     | sICAM-1 and NE <b>elevated</b> in EOS                 | ELISA<br>Antibody array | sICAM-1/<br>NE: NS                                                             | sICAM-1: NS<br>NE: 499.2 ± 22.0                                                  |
| Edgar et al. (20), 2010       | sICAM-1, sE-selectin           | EOS and LOS            | 24-41                   | NS             | sICAM-1 and sE-selectin <b>elevated</b>               | ELISA                   | sICAM-1: 165 (130-290)<br>sE-selectin: 71 (51-118)                             | sICAM-1: 405 (252-666)<br>sE-selectin 158 (94-207)                               |
| Fukanaga et al. (21), 2009    | MMP, TIMP-1                    | Uninfected newborns    | <30                     | Cord blood     | No difference                                         | ELISA                   | MMP-9: 22 (16-48)<br>TIMP-1: 122 (86-249)                                      | NS                                                                               |
| Sunagawa et al. (22), 2009    | MMP-9, TIMP-1                  | Uninfected newborns    | 35-41                   | 1-2 days       | NA                                                    | ELISA                   | NS                                                                             | NA                                                                               |
| Figueras et al. (23), 2007    | sICAM-1, sVCAM-1, sP-selectin, | EOS and LOS            | 32-40                   | 1-32 days      | sICAM-1 and sVCAM-1 <b>increased</b> over time.       | ELISA                   | sICAM-1: 156 (150-194)<br>sVCAM-1: 856 (742-960)<br>sP-selectin: 272 (152-288) | sICAM-1: 394 (342-600)<br>sVCAM-1: 1153 (726-1307)<br>sP-selectin: 244 (170-324) |
| Sitaru et al. (24), 2005      | sP-selectin                    | Chorioamnionitis       | 25-40                   | Cord blood     | sP-selectin <b>elevated</b> in chorioamnionitis       | ELISA                   | 104 ± 71                                                                       | 222 ± 128                                                                        |
| Schulz et al. (25), 2004      | MMP-9, TIMP-1                  | Uninfected newborns    | 25-40                   | 1-28 days      | MMP-9 highest in preterm<br>TIMP-1 highest in at term | ELISA                   | NS                                                                             | NA                                                                               |
| Edgar et al.                  | sICAM-1                        | EOS and LOS            | 24-42                   | NS             | sICAM-1 <b>elevated</b> in                            | ELISA                   | 205 (146-343)                                                                  | 406 (345-1180)                                                                   |

|                             |                               |                        |         |             |                                                                 |       |                                                                                                   |                                                               |
|-----------------------------|-------------------------------|------------------------|---------|-------------|-----------------------------------------------------------------|-------|---------------------------------------------------------------------------------------------------|---------------------------------------------------------------|
| (26), 2002                  |                               |                        |         |             | BCPS                                                            |       |                                                                                                   |                                                               |
| Apostolou et al. (27), 2002 | sICAM-1                       | EOS and LOS            | 25-42   | NS          | sICAM-1 <b>elevated</b> in BCPS                                 | ELISA | 358.4 ± 28.9                                                                                      | 710.7 ± 56.6                                                  |
| Dollner et al. (28), 2001   | sICAM-1, sE-selectin          | EOS and LOS            | 30-42   | 1-7 days    | sICAM-1 and sE-selectin <b>elevated</b> in BCPS                 | ELISA | sICAM-1: 244.0 (92.5-500)<br>sE-selectin: 91.4 (<2.0-217.8)                                       | sICAM-1: 357.4 (141.6-500)<br>sE-selectin: 151.7 (37.0-362.2) |
| Malamitsi et al. (29), 2000 | sVCAM-1, sPECAM-1             | Uninfected newborns    | 37-40   | 1-5 days    | No change between day 1 and 5                                   | ELISA | sVCAM-1: 1340 ± 58.3<br>sPECAM-1: 17.5 ± 0.7                                                      | NA                                                            |
| Giannaki et al. (30), 2000  | sE-selectin                   | Uninfected newborns    | At term | 1-5 days    | sE-selectin <b>decreases</b> between day 1 and 5                | ELISA | 139 ± 48                                                                                          | NA                                                            |
| Giannaki et al. (31), 1999  | sICAM-1, sVCAM-1              | Uninfected newborns    | At term | 1-5 days    | sICAM-1 and sVCAM-1 <b>increase</b> between day 1 and 5         | ELISA | sICAM: 179 ± 56.1<br>sVCAM-1: 1125.0 ± 281.0                                                      | NA                                                            |
| Phocas et al. (32), 1998    | sICAM-1                       | Uninfected newborns    | 35-42   | 1-30 days   | sICAM-1 <b>increases</b> between day 1, 5 and 30                | ELISA | 137.3 ± 62.0                                                                                      | NA                                                            |
| Berner et al. (33), 1998    | sICAM-1                       | EOS                    | 26-42   | 0-96 hours  | sICAM-1 <b>lower</b> in EOS. sICAM-1 <b>increases</b> over time | ELISA | 421 (291-459)                                                                                     | 446 (171-534)                                                 |
| Austgulen et al. (34), 1997 | sICAM-1, sVCAM-1, sE-selectin | EOS and LOS, pneumonia | 24-42   | 0-162 hours | sE-selectin and sICAM-1 <b>elevated</b> in infected neonates    | ELISA | sE-selectin: 84.2 (21.6-231.3)<br>sICAM-1: 2131.3 (1449.5-3500.0)<br>sVCAM-1: 237.0 (122.0-500.0) | NS                                                            |

CAM = endothelial cell adhesion molecule; sVCAM-1 = soluble Vascular Cell Adhesion Molecule-1; sICAM-1 = soluble Intercellular Adhesion Molecule-1; NE = neutrophil elastase NA = Not available; NS = Not specified; EOS = Early Onset Sepsis; LOS = Late Onset Sepsis; BCPS = Blood Culture Positive Sepsis.

<sup>a</sup> Levels are in mean ± SD, mean ± SEM, median (interquartile range), or median (range).

# BMJ Paediatrics Open

## Serum concentrations of endothelial cell adhesion molecules and their shedding enzymes and early onset sepsis in newborns in Suriname

|                               |                                                                                                                                                                                                                                                                                                                         |
|-------------------------------|-------------------------------------------------------------------------------------------------------------------------------------------------------------------------------------------------------------------------------------------------------------------------------------------------------------------------|
| Journal:                      | <i>BMJ Paediatrics Open</i>                                                                                                                                                                                                                                                                                             |
| Manuscript ID                 | bmjpo-2018-000312.R1                                                                                                                                                                                                                                                                                                    |
| Article Type:                 | Original article                                                                                                                                                                                                                                                                                                        |
| Date Submitted by the Author: | 30-Jul-2018                                                                                                                                                                                                                                                                                                             |
| Complete List of Authors:     | Zonneveld, Rens; University Medical Center Groningen, Jongman, Rianne; University Medical Center Groningen Juliana, Amadu; Academic Hospital Paramaribo, Pediatrics Molema, Grietje; University Medical Center Groningen Meurs, Matijs; University Medical Center Groningen Plötz, Frans; Tergooi Hospitals, Pediatrics |
| Keywords:                     | Neonatology, Infectious Diseases                                                                                                                                                                                                                                                                                        |
|                               |                                                                                                                                                                                                                                                                                                                         |

SCHOLARONE™  
Manuscripts

1  
2  
3 1  
4 2 **Serum concentrations of endothelial cell adhesion molecules and their shedding enzymes**  
5  
6 3 **and early onset sepsis in newborns in Suriname**  
7  
8 4  
9 5

10 6 Rens Zonneveld, MD PhD (1,2), Rianne M. Jongman, PhD (1,3,4), Amadu Juliana, MD (2),  
11 7 Grietje Molema, PhD (1), Matijs van Meurs, MD PhD (1,3), Frans B. Plötz, MD PhD (5)  
12  
13 8  
14 9

15  
16  
17 10 (1) Department of Pathology and Medical Biology, University Medical Center Groningen,  
18 11 University of Groningen, Groningen, The Netherlands; (2) Academic Pediatric Center  
19 12 Suriname, Academic Hospital Paramaribo, Paramaribo, Suriname; (3) Department of Critical  
20 13 Care and (4) Anesthesiology, University Medical Center Groningen, University of Groningen,  
21 14 Groningen, The Netherlands; (5) Department of Pediatrics, Tergooi Hospitals, Blaricum, The  
22 15 Netherlands.  
23  
24  
25  
26  
27 16

28  
29 17 **Correspondence**

30 18 Rens Zonneveld, MD PhD  
31 19 Academic Pediatric Center Suriname  
32 20 Academic Hospital Paramaribo  
33 21 Flustraaf 1, Paramaribo, Suriname  
34  
35  
36  
37 22

38 23 Department of Pathology and Medical Biology  
39 24 University Medical Center Groningen, University of Groningen  
40 25 Hanzeplein 1, 9713 GZ Groningen, The Netherlands  
41  
42  
43 26

44  
45 27 **Current affiliation:**

46 28 Amsterdam UMC  
47 29 University of Amsterdam  
48 30 Department of Medical Microbiology  
49 31 Meibergdreef 9, Amsterdam, The Netherlands  
50  
51  
52  
53 32

54 33 Phone: +31 613741216

55 34 Email: rens.zonneveld@gmail.com  
56  
57  
58  
59  
60

1  
2  
3 35 **Short title:** Adhesion molecule shedding in Surinamese newborns  
4 36 **Funding source:** The Thrasher Research Fund (TRF13064) and Tergooi Hospitals, Blaricum,  
5  
6 37 The Netherlands.  
7  
8  
9  
10  
11  
12  
13  
14  
15  
16  
17  
18  
19  
20  
21  
22  
23  
24  
25  
26  
27  
28  
29  
30  
31  
32  
33  
34  
35  
36  
37  
38  
39  
40  
41  
42  
43  
44  
45  
46  
47  
48  
49  
50  
51  
52  
53  
54  
55  
56  
57  
58  
59  
60

Confidential: For Review Only

1  
2  
3 38 **ABSTRACT**

4  
5 39 **Background:** Early Onset Sepsis (EOS) is defined as onset of sepsis within 72 hours after  
6  
7 40 birth. Leukocyte-endothelial interactions play a pivotal part in EOS pathophysiology.

8  
9 41 Endothelial cell adhesion molecules (CAMs) orchestrate these interactions and their soluble  
10  
11 42 isoforms (sCAMs) are released into the vasculature by enzymes called sheddases.

12  
13 43 **Purpose:** This study was undertaken to explore further the pathophysiology of EOS and to  
14  
15 44 investigate the potential of sCAM and their sheddases as potential biomarkers for EOS.

16  
17 45 **Methods:** Stored serum aliquots were used from 71 Surinamese newborns suspected of EOS  
18  
19 46 and 20 healthy newborns from an earlier study. Serum had been collected within 72 hours  
20  
21 47 after birth and six (8.6%) newborns had a positive blood culture with gram-negative  
22  
23 48 pathogens. Concentrations of sCAMs sP-selectin, sE-selectin, vascular cell adhesion  
24  
25 49 molecule-1 (sVCAM-1), intercellular adhesion molecule-1 (sICAM-1) and platelet and  
26  
27 50 endothelial cell adhesion molecule-1 (sPECAM-1), sheddases matrix metalloproteinase-9  
28  
29 51 (MMP-9) and neutrophil elastase (NE), and sheddase antagonist tissue-inhibitor of  
30  
31 52 metalloproteinases-1 (TIMP-1) were measured simultaneously with Luminex and ELISA.

32  
33 53 **Results:** MMP-9 and TIMP-1 levels were measured in serum of n=91 newborns and sCAMs  
34  
35 54 and NE levels in serum of n=80 newborns, respectively. We found no differences in median  
36  
37 55 concentrations of sCAMs, MMP-9 and TIMP-1, or NE between blood culture positive EOS,  
38  
39 56 blood culture negative EOS, and control groups at start of antibiotic treatment.

40  
41 57 **Conclusions:** Our data indicate that serum concentrations of sCAMs and their sheddases have  
42  
43 58 no clinical utility as biomarkers for EOS.

44  
45  
46  
47  
48  
49 59

50 60 **Keywords:** newborns; early onset sepsis; adhesion molecules; shedding; Suriname.

51  
52  
53 61

54  
55 62  
56  
57  
58  
59  
60

1  
2  
3 63 **KEY MESSAGES**  
4

5 64

6  
7 65 **What is already known on this topic?**  
8

9 66 • Recently, we established an association of the Ang-1/Ang-2 disbalance with blood  
10  
11 67 culture positive early onset sepsis (EOS) in newborns.

12  
13 68 • The relationship between this Ang-1/Ang-2 disbalance and serum levels of sCAMs  
14  
15 69 and their sheddases is unclear.  
16  
17

18 70 **What this study adds?**  
19

20 71 • The Ang-1/Ang-2 disbalance in blood culture positive EOS is not paralleled by  
21  
22 72 increased levels of sCAMs and their sheddases.

23  
24 73 • Levels of sCAMs and their sheddases are high after birth and do not discriminate EOS  
25  
26 74 from healthy newborns.  
27  
28

29 75  
30  
31  
32  
33  
34  
35  
36  
37  
38  
39  
40  
41  
42  
43  
44  
45  
46  
47  
48  
49  
50  
51  
52  
53  
54  
55  
56  
57  
58  
59  
60

## 76 INTRODUCTION

77 Early onset sepsis (EOS) in newborns within 72 hours after birth remains a clinical challenge  
78 with high morbidity and mortality [1-3]. The majority of global neonatal deaths due to EOS  
79 occur in developing countries [4]. The diagnosis of EOS is complicated, resulting in late  
80 recognition, or overtreatment of newborns with antibiotics. These dilemmas arise because the  
81 pathophysiology of EOS is poorly understood.

82 A hallmark of sepsis pathophysiology is endothelial cell activation followed by  
83 leukocyte recruitment into tissues [5]. The current model describes the occurrence of a shift in  
84 balance in Tie2 receptor ligands Angiopoietin (Ang)-1 and Ang-2 affecting endothelial  
85 integrity, and increased expression of endothelial cell adhesion molecules, in particular P-  
86 selectin, E-selectin, vascular cell adhesion molecule (VCAM-1), and intercellular adhesion  
87 molecule (ICAM-1) to facilitate this recruitment [6,7]. These endothelial cell adhesion  
88 molecules orchestrate leukocyte rolling on, adhesion to, and diapedesis across the  
89 endothelium [7,8]. Also, platelet and endothelial cell adhesion molecule (PECAM-1),  
90 expressed at endothelial cell junctions has a function in facilitating paracellular transmigration  
91 of leukocytes across the endothelium [9]. After intravenous administration of endotoxin in  
92 healthy adults as a sepsis model, peak concentrations of Ang-2 prelude the release of soluble  
93 isoforms of cell adhesion molecules (sCAMs) into the systemic circulation [10]. Endothelial  
94 cell adhesion molecules are released through ectodomain shedding by enzymes called  
95 sheddases, in particular matrix metalloproteinase-9 (MMP-9) and neutrophil elastase (NE),  
96 released from granules in neutrophils [7,11]. Both MMP-9 and NE prepare the extracellular  
97 matrix for transmigration of leukocytes into inflammatory sites [12]. MMP-9 activity is  
98 balanced by sheddase antagonist tissue-inhibitor of metalloproteinases-1 (TIMP-1) [12-14].

99 Recently, we showed in a cohort of near term and term Surinamese newborns that a  
100 systemic dysbalance in Ang-2/Ang-1 concentrations was associated with blood culture



1  
2  
3 101 positive EOS [15]. This study was undertaken to examine if this dysbalance is paralleled by  
4  
5 102 increased serum concentrations of sCAMs and sheddases in this cohort of newborns with  
6  
7 103 EOS to explore further the pathophysiology of EOS. We hypothesized that sCAM and  
8  
9 104 sheddases concentrations measured at start of antibiotic treatment for suspected EOS are  
10  
11 105 higher in newborns with blood culture positive EOS than in healthy controls.  
12  
13  
14  
15

## 16 107 **MATERIALS & METHODS**

### 17 108 **Study design, subjects and clinical protocol**

18  
19  
20 109 For this study, we used a Surinamese cohort of 20 healthy newborns and 71 newborns with  
21  
22 110 suspected EOS from an earlier reported study [15]. All newborns were included after  
23  
24 111 admission between April 1 2015 and May 31 2016 to the neonatal care facility of Academic  
25  
26 112 Pediatric Center Suriname at the Academic Hospital Paramaribo in Suriname. Included were  
27  
28 113 newborns with a gestational age equal to or above 34 weeks in whom antibiotics were started  
29  
30 114 within the first 72 hours of life for suspected EOS. Suspicion of EOS was based on the  
31  
32 115 attending physicians decision to start antibiotic treatment. Informed consent was obtained  
33  
34 116 from at least one parent for the use of residual serum and clinical information. The study  
35  
36 117 protocol was made available on clinicaltrials.gov (NCT02486783) and was approved by the  
37  
38 118 Surinamese Medical Ethical Board (VG-021-14A) including permission of one parent.  
39  
40

41 119 The management of these patients was described before [15]. In short, healthy control  
42  
43 120 newborns and newborns suspected of EOS were included at start of antibiotic treatment  
44  
45 121 within 72 hours after birth. At start of antibiotic treatment blood was collected for separation  
46  
47 122 and storage of serum. Controls were newborns without signs of infection receiving blood  
48  
49 123 draws for hyperbilirubinemia (n=20). Newborns with suspected EOS receiving treatment with  
50  
51 124 intravenous antibiotics were divided in two groups based on result from blood culturing:  
52  
53 125 blood culture negative EOS (n=65) and blood culture positive EOS (n=6).  
54  
55  
56  
57  
58  
59  
60

1  
2  
3 1264  
5 127 **Sample collection, preparation and analysis**

6  
7 128 In the previous study, serum had been collected from whole blood collected after insertion of  
8  
9 129 a venous cannula in newborns suspected of EOS and after capillary collection in controls  
10  
11 130 [15]. Frozen serum samples had been transported on dry ice to the Netherlands and aliquoted  
12  
13 131 and frozen again upon arrival. A stored aliquot was used for the measurement of sP-selectin,  
14  
15 132 sE-selectin, sVCAM-1, sICAM-1, and sPECAM-1 using the Human Magnetic Bead  
16  
17 133 Adhesion 6-plex panel performance assay (LHC0016M, Thermo Scientific, Waltham, MA  
18  
19 134 USA) according to the manufacturer's instructions. ELISA was used on the same aliquots for  
20  
21 135 measurement of neutrophil elastase (HK319-02, Hycult Biotech, Uden, The Netherlands),  
22  
23 136 MMP-9 (Quantikine DMP900, R&D systems, Minneapolis, MN USA), and TIMP-1  
24  
25 137 (Quantikine DTM100, R&D systems), each according to the manufacturers' instructions. For  
26  
27 138 each molecule, a standard curve was established via which concentrations in neonatal serum  
28  
29 139 were determined. Levels below or above the linear part of this standard curve were reported  
30  
31 140 as the lowest or highest value of the standard curve, respectively. We measured intra-assay  
32  
33 141 variation between plates used in the same assay by calculating coefficient of variation  
34  
35 142 between levels of each molecule in samples from the same patient divided over those plates  
36  
37 143 and accepted a maximum of 20%.

38  
39  
40  
41  
42 14443  
44 145 **Statistical analysis**

45  
46 146 A Kruskal-Wallis test with Dunn's correction for multiple comparisons were used for analysis  
47  
48 147 between the blood parameters and the three groups (blood culture positive EOS, blood culture  
49  
50 148 negative EOS, and control groups). P-values <0.05 were considered statistically significant.  
51  
52 149 All analyses were done using Prism version 7.0a (Graphpad Software Inc., San Diego, CA  
53  
54 150 USA).

151

**152 RESULTS**

153 Demographic variables of the whole study cohort (n=91) can be found in Table 1 of reference  
154 15. Of baseline characteristics birth weight, age at presentation (between 0 and 72 hours after  
155 birth), and Apgar score at 5 minutes were distributed unevenly amongst the three groups  
156 (P<0.05). Blood culture results revealed that 6 of 70 newborns with suspected EOS (8.6%;  
157 95% CI 1.9-15.3%) had a positive blood culture with gram-negative pathogens *Klebsiella*  
158 *pneumoniae* (n=2), *Enterobacter cloacae* (n=2) and *Escherichia coli* (n=2). One newborn had  
159 EOS due to a spontaneous bacterial peritonitis. For n=4 others cause of EOS was unknown,  
160 but they presented with neonatal jaundice (n=1), perinatal asphyxia (n=1), meconium  
161 aspiration (n=1), and hypoglycaemia (n=1).

162

**163 Serum concentrations of soluble endothelial cell adhesion molecules and their sheddases**

164 Due to the limited amount of serum available, not all molecules could be measured in all  
165 samples. We were able to measure MMP-9 and TIMP-1 levels in serum of n=90 newborns  
166 and sCAMs and NE levels in serum of n=80 newborns, respectively. We found no differences  
167 in median concentrations of sCAMs (Figure 1), MMP-9 and TIMP-1 (Figure 2), or NE  
168 (Figure 3) between blood culture positive EOS, blood culture negative EOS, and control  
169 groups at start of antibiotic treatment within 72 hours after birth.

170

**171 DISCUSSION**

172 In this study we investigated whether sCAMs and their sheddases circulate at higher  
173 concentrations in near and at term newborns with blood culture positive EOS at start of  
174 antibiotic treatment. In contrast to our hypothesis, none of the molecules showed any  
175 difference in serum concentrations between blood culture positive EOS, blood culture

1  
2  
3 176 negative EOS, and controls within 72 hours after birth. Our data indicate that serum  
4  
5 177 concentrations of sCAMs and their sheddases have no clinical utility as biomarkers for EOS  
6  
7 178 nor to guide the start of antibiotic treatment.

8  
9 179 Previously, we found evidence for endothelial cell activation in blood culture positive  
10  
11 180 EOS in the same newborns used for this study, represented by a dysbalance in Ang-2/Ang-1  
12  
13 181 ratio [15]. Since the current data demonstrate that this dysbalance was not paralleled by  
14  
15 182 increased release of sCAM or sheddases in EOS we conclude that endothelial cell adhesion  
16  
17 183 molecule shedding is not or to a lesser extent involved in the pathophysiology of EOS. For  
18  
19 184 interpretation of our data we reviewed and summarized available data on sCAMs and  
20  
21 185 sheddases in newborns with sepsis in Supplemental Table 1 [16-34]. Comparison of our  
22  
23 186 results with other existing data is complicated because of heterogenic make up of chosen  
24  
25 187 cohorts. Only one study reported a comparable cohort of near and at term newborns with  
26  
27 188 suspected EOS within 72 hours after birth, in whom increased concentrations of sICAM-1  
28  
29 189 and neutrophil elastase were associated with blood culture positive EOS [19]. Other earlier  
30  
31 190 studies compared concentrations of sCAMs in heterogenic cohorts consisting of newborns  
32  
33 191 with different gestational and postnatal ages, either having EOS (based on varying  
34  
35 192 definitions), or sepsis after 72 hours after birth (i.e., late onset sepsis). This variation in  
36  
37 193 inclusion criteria is an important confounding factor in the interpretation of the observed  
38  
39 194 concentrations in septic and healthy newborns. Overall, our results are in line with these  
40  
41 195 studies that show that clinical utility of sCAMs and sheddases in EOS is very limited.

42  
43  
44 196 In an earlier review by our group we pooled published data on sCAM concentrations  
45  
46 197 in newborns [7]. Soluble CAM concentrations in the current study corresponded well with  
47  
48 198 concentrations discussed in our review and those established in earlier studies in uninfected  
49  
50 199 healthy newborns with similar gestational and postnatal age [7, 23,24,29-32]. However,  
51  
52 200 MMP-9, TIMP-1, and neutrophil elastase concentrations were different and up to 4, 2, and  
53  
54  
55  
56  
57  
58  
59  
60

1  
2  
3 201 10-fold higher, respectively, than those reported in earlier studies [17,18,21,22,25,30], which  
4  
5 202 may have been due to other methods used (see limitations). Furthermore, our earlier review  
6  
7 203 and earlier data indicated that significant age-related discrepancies exist in sCAM  
8  
9 204 concentrations between newborns, children and adults. As an example, in at term newborns  
10  
11 205 sVCAM-1 concentrations in the first postnatal week were almost twice the concentrations in  
12  
13 206 healthy adults, and equally high compared to septic adults, suggesting that sVCAM-1  
14  
15 207 concentrations start of high in early newborn life and then decrease with increasing age  
16  
17 208 [7,31]. In our study, concentrations of sCAMs and sheddases during the first 3 days of life in  
18  
19 209 our study remained stable, which was in contrast with earlier work in healthy newborns  
20  
21 210 showing that sE-selectin decreased, and sICAM-1 and sVCAM-1 increased between day 1  
22  
23 211 and 5 after birth, while sPECAM-1 levels did not change [29-32]. Even though some  
24  
25 212 discrepancies with earlier reports exist, overall one can conclude that these and our data  
26  
27 213 indicate that concentrations of sCAMs and sheddases measured within 72 hours after birth are  
28  
29 214 high and do not discriminate between septic and healthy newborns, which limits their use as  
30  
31 215 biomarkers for early identification or exclusion of EOS.  
32  
33  
34

35 216 Our and pre-existing data suggest that overall high sCAM and sheddase concentrations  
36  
37 217 in newborns are the result of other perinatal factors than EOS. Several pathophysiological  
38  
39 218 processes may explain this premise. Birth may induce a ‘pro-adhesive’ state of the  
40  
41 219 endothelium leading to increased endothelial cell adhesion molecules expression on, and  
42  
43 220 shedding from, its surface. Additionally, the increase in overall leukocyte numbers and  
44  
45 221 inflammatory activation of subsets associated with human birth, which was shown to be  
46  
47 222 positively associated with increased perinatal stress [35-37], may cause higher intensity of  
48  
49 223 leukocyte-endothelial interactions and subsequent increases endothelial cell adhesion  
50  
51 224 molecules shedding. Aberrant adhesion of activated leukocytes to activated endothelium is  
52  
53 225 associated with endothelial dysfunction and increased vascular permeability [38,39].  
54  
55  
56  
57  
58  
59  
60

1  
2  
3 226 Shedding of endothelial cell adhesion molecules may then result in prevention of aberrant  
4  
5 227 leukocyte adhesion on two complementary levels, namely 1) to lower endothelial cell  
6  
7 228 adhesion molecules density to prevent adhesion or promote de-adhesion of already adhering  
8  
9 229 leukocytes and 2) to release circulating sCAMs that act as ‘decoy receptors’ to capture  
10  
11 230 leukocytes in the vasculature to limit leukocyte-endothelial interactions [7,10]. Whether this  
12  
13 231 occurs in real life and what the contribution is to sCAM and sheddase concentrations in  
14  
15 232 newborns remains unknown and could be studied in neonatal animal models [40-42].

16  
17  
18 233 Our study has some limitations. First, sample size was relatively small. As a result,  
19  
20 234 logistic regression analysis of other factors, such as maternal perinatal factors or method of  
21  
22 235 birth, potentially influencing levels of sCAMs and sheddases, was precluded. Larger studies  
23  
24 236 in countries such as Suriname, where the incidence of EOS is relatively high in comparison to  
25  
26 237 Western countries [43], are necessary and can contribute to better insight in the vascular  
27  
28 238 pathophysiology of EOS. Second, the use of serum in our study may have caused release of  
29  
30 239 stored pools of MMP-9, TIMP-1, and neutrophil elastase from disrupted leukocytes during  
31  
32 240 the clotting process, which could have accounted for higher levels of these molecules than  
33  
34 241 reported in earlier studies. Last, repeated freeze-thaw cycles may have affected quality of  
35  
36 242 serum samples with regards to reproducibility of NE concentrations.

37  
38  
39 243 In conclusion, our data indicate that serum concentrations of sCAMs and sheddases  
40  
41 244 are not higher in Surinamese newborns with EOS versus controls at start of antibiotic  
42  
43 245 treatment. Although concentrations may still increase significantly more in newborns with  
44  
45 246 EOS, other mechanisms, such as perinatal stress during birth, may drive overall high  
46  
47 247 concentrations in all newborns which precludes discrimination between septic and healthy  
48  
49 248 newborns.

50  
51  
52 249  
53  
54 250  
55  
56  
57  
58  
59  
60

1  
2  
3 251 **ABBREVIATIONS AND DEFINITIONS**

4  
5 252 EOS = Early onset sepsis

6  
7 253 ICAM-1 = Intercellular adhesion molecule-1

8  
9 254 VCAM-1= Vascular cell adhesion molecule-1

10  
11 255 PECAM-1= Platelet and endothelial cell adhesion molecule-1

12  
13 256 MMP-9 = Matrix metalloproteinase-9

14  
15 257 TIMP-1 = Tissue-inhibitor of metalloproteinases-1

16  
17  
18 258

19  
20 259 **ACKNOWLEDGEMENTS**

21  
22 260 The research in this study was supported by the Thrasher Research Fund (TRF13064) (R.

23  
24 261 Zonneveld) and Tergooi Hospitals, Blaricum, The Netherlands. The authors acknowledge the

25  
26 262 efforts of all employees of the Clinical Laboratory of the Academic Hospital Paramaribo and

27  
28 263 the Central Laboratory of Suriname, Paramaribo, Suriname, for assistance with sample

29  
30 264 storage, handling and transport. We would like to thank Dr. Ellen Tromp for assistance with

31  
32 265 the statistical analysis for the final version of this paper.

33  
34  
35 266

36  
37 267 **CONFLICTS OF INTEREST**

38  
39 268 The authors declare no conflicts of interest

40  
41  
42 269

43  
44 270 **AUTHOR CONTRIBUTIONS**

45  
46 271 RZ, MvM, GM, and FBP conceived and designed the study. RZ and AJ collected clinical data

47  
48 272 and collected the samples. RZ, RMJ, and MvM prepared the samples and performed the

49  
50 273 sample analysis. RZ and MvM analyzed the final database. RZ, MvM, GM, and FBP drafted

51  
52 274 the manuscript. All authors co-authored and approved the final manuscript.

53  
54  
55 275



276 **REFERENCES**

- 277 1. Van Herk W, Stocker M, van Rossum AM. Recognising early onset neonatal sepsis:  
278 an essential step in appropriate antimicrobial use. *J Infect* 2016, 72:S77-82.
- 279 2. Simonson KA, Anderson-Berry AL, Delair SF, Davies HD. Early-onset neonatal  
280 sepsis. *Clin Microbiol Rev* 2014, 27(1):21-47.
- 281 3. Stoll BJ. Early-onset neonatal sepsis: a continuing problem in need of novel  
282 prevention strategies. *Pediatrics* 2016, 138(6): e20163038.
- 283 4. Lawn JE, Cousens S, Zupan J; Lancet Neonatal Survival Steering Team. 4 million  
284 neonatal deaths: when? Where? Why? *Lancet* 2005, 365(9462):891-900.
- 285 5. Aird WC. The role of the endothelium in severe sepsis and multiple organ dysfunction  
286 syndrome. *Blood* 2003, 101(10):3765-77.
- 287 6. Fiedler U, Augustin HG. Angiopoietins: a link between angiogenesis and  
288 inflammation *Trends Immunol* 2006, 27:552-558.
- 289 7. Zonneveld R, Martinelli R, Zonneveld R, Martinelli R, Shapiro NI, Kuijpers TW,  
290 Plötz FB, Carman CV. Soluble adhesion molecules as markers for sepsis and the  
291 potential pathophysiological discrepancy in neonates, children and adults. *Crit Care*  
292 2014, 18;18(1):204.
- 293 8. Ley K, Laudanna C, Cybulsky MI, Nourshargh S. Getting to the site of inflammation:  
294 the leukocyte adhesion cascade updated. *Nat Rev Immunol* 2007, 7(9):678-89.
- 295 9. Privratsky JR, Newman PJ. PECAM-1: regulator of endothelial junctional integrity.  
296 *Cell Tissue Res* 2014, 355(3): 607–619.
- 297 10. Kümpers P, van Meurs M, David S, Molema G, Bijzet J, Lukasz A, Biertz F, Haller  
298 H, Zijlstra JG. Time course of angiopoietin-2 release during experimental human  
299 endotoxemia and sepsis. *Crit Care* 2009, 13(3):R64.



- 1  
2  
3 300 11. Garton KJ, Gough PJ, Raines EW. Emerging roles for ectodomain shedding in the  
4  
5 301 regulation of inflammatory responses. *J Leukoc Biol* 2006, 79(6):1105-16.  
6  
7 302 12. Elkington PTG, O’Kane CM, Friedland JS. The paradox of matrix metalloproteinases  
8  
9 303 in infectious disease. *Clin Exp Immunol* 2005, 142(1): 12-20.  
10  
11 304 13. Brew K, Nagase H. The tissue inhibitors of metalloproteinases (TIMPs): An ancient  
12  
13 305 family with structural and functional diversity. *Biochim Biophys Acta* 2010, 1803(1):  
14  
15 306 55–71.  
16  
17 307 14. Lorente L, Martín MM, Solé-Violán J, Blanquer J, Labarta L, Díaz C, Borreguero-  
18  
19 308 León JM, Orbe J, Rodríguez JA, Jiménez A, Páramo JA. Association of sepsis-related  
20  
21 309 mortality with early increase of TIMP-1/MMP-9 ratio. *PLoS One* 2014,  
22  
23 310 11;9(4):e94318.  
24  
25 311 15. Zonneveld R, Jongman R, Juliana A, Zijlmans W, Plötz FB, Molema G, Van Meurs  
26  
27 312 M. Low Serum Angiopoietin-1, high Angiopoietin-2, and high Ang-2/Ang-1 Protein  
28  
29 313 Ratio are Associated with Early Onset Sepsis in Surinamese Newborns. *Shock* 2017  
30  
31 314 16. Fattah MA, Omer AF, Asaif S, Manlulu R, Karar T, Ahmed A, Aljada A, Saleh AM,  
32  
33 315 Qureshi S, Nasr A. Utility of cytokine, adhesion molecule and acute phase proteins in  
34  
35 316 early diagnosis of neonatal sepsis. *J Nat Sci Biol Med* 2017, 8(1):32-39.  
36  
37 317 17. Weitkamp JH, Guthrie SO, Wong HR, Moldawer LL, Baker HV, Wynn JL.  
38  
39 318 Histological chorioamnionitis shapes the neonatal transcriptomic immune response.  
40  
41 319 *Early Hum Dev* 2016, 98:1-6.  
42  
43 320 18. Wynn JL, Guthrie SO, Wong HR, Lahni P, Ungaro R, Lopez MC, Baker HV,  
44  
45 321 Moldawer LL. Postnatal Age Is a Critical Determinant of the Neonatal Host Response  
46  
47 322 to Sepsis. *Mol Med.* 2015;21:496–504  
48  
49 323 19. Sugitharini V, Prema A, Berla Thangam E. Inflammatory mediators of systemic  
50  
51 324 inflammation in neonatal sepsis. *Inflamm Res* 2013, 62(12):1025-34.  
52  
53  
54  
55  
56  
57  
58  
59  
60

- 1  
2  
3 325 20. Edgar JDM, Gabriel V, Gallimore JR, McMillan SA, Grant J. A prospective study of  
4  
5 326 the sensitivity, specificity and diagnostic performance of soluble intercellular adhesion  
6  
7 327 molecule 1, highly sensitive C-reactive protein, soluble E-selectin and serum amyloid  
8  
9 328 A in the diagnosis of neonatal infection. *BMC Pediatr* 2010, 16:10–22.
- 10  
11 329 21. Fukunaga S, Ichiyama T, Maeba S, Okuda M, Nakata M, Sugino N, Furukawa S.  
12  
13 330 MMP-9 and TIMP-1 in the cord blood of premature infants developing BPD. *Ped*  
14  
15 331 *Pulm* 2009, 44: 267-272.
- 16  
17  
18 332 22. Sunagawa S, Ichiyama T, Honda R, Fukunaga S, Maeba S, Furukawa S. Matrix  
19  
20 333 metalloproteinase-9 and tissue inhibitor of metalloproteinase-1 in perinatal asphyxia.  
21  
22 334 *Brain Dev* 2009, 31(8):588-93.
- 23  
24 335 23. Figueras-Aloy J, Gómez-López L, Rodríguez-Miguélez JM, Salvia-Roiges MD,  
25  
26 336 Jordán-García I, Ferrer-Codina I, Carbonell-Estrany X, Jiménez-González R. Serum  
27  
28 337 soluble ICAM-1, VCAM-1, L-selectin and P-selectin levels as markers of infection  
29  
30 338 and their relation to clinical severity in neonatal sepsis. *Am J Perinat* 2007, 24:331–  
31  
32 339 338.
- 33  
34  
35 340 24. Sitaru AG, Speer CP, Holzhauer S, Obergefell A, Walter U, Grossmann R.  
36  
37 341 Chorioamnionitis is associated with increased CD40L expression on cord blood  
38  
39 342 platelets. *Thromb Haemost* 2005, 94(6):1219-23.
- 40  
41  
42 343 25. Schulz CG, Sawicki G, Lemke RP, Roeten BM, Schulz R, Cheung PY. MMP-2 and  
43  
44 344 MMP-9 and their tissue inhibitors in the plasma of preterm and term neonates. *Pediatr*  
45  
46 345 *Res* 2004, 55(5):794-801.
- 47  
48 346 26. Edgar JDM, Gabriel V, Craig A, Wheeler D, Thomas M, Grant J. A low serum  
49  
50 347 sICAM-1 level may assist in the exclusion of neonatal infection. *Biol Neonate* 2002,  
51  
52 348 81:105–108.
- 53  
54  
55  
56  
57  
58  
59  
60

- 1  
2  
3 349 27. Apostolou M, Dimitriou H, Kaleyias J, Perdikogianni C, Stiakaki E, Costalos C,  
4  
5 350 Kalmanti MC. Levels of soluble ICAM-1 in premature and full-term neonates with  
6  
7 351 infection. *Mediators Inflamm* 2002, 11:95–98.  
8  
9 352 28. Dollner H, Vatten L, Austgulen R. Early diagnostic markers for neonatal sepsis:  
10  
11 353 comparing C-reactive protein, interleukin-6, soluble tumor necrosis factor receptors  
12  
13 354 and soluble adhesion molecules. *J Clin Epidemiol* 2001, 54:1251–1257.  
14  
15 355 29. Malamitsi-Puchner A, Tziotis J, Mastorakos G, Protonotariou E, Creatsas G. Adhesion  
16  
17 356 molecules in early neonatal life. *Biol Neonate* 2000, 78(1):65-7.  
18  
19 357 30. Giannaki G, Rizos D, Xyni K, Sarandakou A, Protonotariou E, Phocas I, Creatsas G.  
20  
21 358 Serum soluble E-and L-selectin in the very early neonatal period. *Early Hum Develop*  
22  
23 359 2000, 60:149–155.  
24  
25 360 31. Giannaki G, Xyni K, Rizos D, Phocas I. Comparative study of serum soluble VCAM-  
26  
27 361 1 and ICAM-1 levels in the early neonatal period. *Acta Paediatr* 1999, 88(12):1413-4.  
28  
29 362 32. Phocas I, Sarandakou A, Giannaki G, Malamitsi-Puchner A, Rizos D, Zourlas PA.  
30  
31 363 Soluble intercellular adhesion molecule-1 in newborn infants. *Eur J Pediatr* 1998,  
32  
33 364 157(2):153-6.  
34  
35 365 33. Berner R, Niemeyer CM, Leititis JU, Funke A, Schwab C, Rau U, Richter K, Tawfeek  
36  
37 366 MS, Clad A, Brandis M. Plasma levels and gene expression of granulocyte colony-  
38  
39 367 stimulating factor, tumor necrosis factor-(alpha), interleukin (IL)-1(beta), IL-6, IL-8,  
40  
41 368 and soluble intercellular adhesion molecule-1 in neonatal early onset sepsis. *Pediatr*  
42  
43 369 *Res* 1998, 44:469–477.  
44  
45 370 34. Austgulen R, Arntzen KJ, Haereid PE, Aag S, Døllner H. Infections in neonates  
46  
47 371 delivered at term are associated with increased serum levels of ICAM-1 and E-  
48  
49 372 selectin. *Acta Paediatr* 1997, 86:274–280.  
50  
51  
52  
53  
54  
55  
56  
57  
58  
59  
60

- 1  
2  
3 373 35. Lim FT, van Winsen L, Willemze R, Kanhai HH, Falkenburg JH. Influence of  
4  
5 374 delivery on numbers of leukocytes, leukocyte subpopulations, and hematopoietic  
6  
7 375 progenitor cells in human umbilical cord blood. *Blood Cells* 1994,20(2-3):547-58;  
8  
9 376 discussion 558-9.  
10  
11 377 36. Lim FT, Scherjon SA, van Beckhoven JM, Brand A, Kanhai HH, Hermans JM,  
12  
13 378 Falkenburg JH. Association of stress during delivery with increased numbers of  
14  
15 379 nucleated cells and hematopoietic progenitor cells in umbilical cord blood. *Am J*  
16  
17 380 *Obstet Gynecol* 2000, 183(5):1144-52  
18  
19  
20 381 37. Duijts L, Bakker-Jonges LE, Labout JA, Jaddoe VW, Hofman A, Steegers EA, Van  
21  
22 382 Dongen JJ, Hooijkaas H, Moll HA. Perinatal stress influences lymphocyte subset  
23  
24 383 counts in neonates. The generation R study. *Pediatr Res* 2008, 63(3):292-8.  
25  
26 384 38. Beyrau M, Bodkin JV, Nourshargh S. Neutrophil heterogeneity in health and disease:  
27  
28 385 a revitalized avenue in inflammation and immunity. *Open Biol* 2012, 2(11):120134.  
29  
30  
31 386 39. Brown KA, Brain SD, Pearson JD, Edgeworth JD, Lewis SM, Treacher DF.  
32  
33 387 Neutrophils in development of multiple organ failure in sepsis. *Lancet* 2006,  
34  
35 388 368(9530):157-69.  
36  
37 389 40. Shapiro NI, Yano K, Sorasaki M, Fischer C, Shih SC, Aird WC. Skin biopsies  
38  
39 390 demonstrate site-specific endothelial activation in mouse models of sepsis. *J Vasc Res*  
40  
41 391 2009, 46(5):495-502.  
42  
43 392 41. Csonka K, Vadovics M, Marton A, Vágvölgyi C, Zajta E, Tóth A, Tóth R, Vizler C,  
44  
45 393 Tiszlavicz L, Mora-Montes HM, Gácsér A. Investigation of OCH1 in the Virulence of  
46  
47 394 *Candida parapsilosis* Using a New Neonatal Mouse Model. *Front Microbiol* 2017,  
48  
49 395 8:1197.  
50  
51  
52 396 42. Molina-Berrios A, Campos-Estrada C, Lapier M, Duaso J, Kemmerling U, Galanti N,  
53  
54 397 Ferreira J, Morello A, López-Muñoz R, Maya JD. Protection of vascular endothelium  
55  
56  
57  
58  
59  
60

- 1  
2  
3 398 by aspirin in a murine model of chronic Chagas' disease. *Parasitol Res* 2013,  
4  
5 399 112(7):2731-9.  
6  
7 400 43. Zonneveld R, Holband N, Bertolini A, Bardi F, Lissone NPA, Dijk PH, Plötz FB,  
8  
9 401 Juliana A. Improved referral and survival of newborns after scaling up of intensive  
10  
11 402 care in Suriname. *BMC Pediatr* 2017, 17(1):189.  
12  
13  
14  
15  
16  
17  
18  
19  
20  
21  
22  
23  
24  
25  
26  
27  
28  
29  
30  
31  
32  
33  
34  
35  
36  
37  
38  
39  
40  
41  
42  
43  
44  
45  
46  
47  
48  
49  
50  
51  
52  
53  
54  
55  
56  
57  
58  
59  
60

1  
2  
3 403 **FIGURE LEGENDS**

4  
5 404 **Figure 1.**

6  
7 405 **Circulating levels of endothelial adhesion molecules sP-selectin, sE-selectin, sVCAM-1,**  
8  
9 406 **sICAM-1, and sPECAM-1 in Surinamese newborns. A: sP-selectin B: sE-selectin C:**  
10  
11 407 **soluble vascular cell adhesion molecule-1 (sVCAM-1); D: soluble intercellular adhesion**  
12  
13 408 **molecule-1 (sICAM-1); E: soluble platelet and endothelial cell adhesion molecule-1**  
14  
15 409 **(sPECAM-1). Bars represent median values and error bars 95% confidence intervals. P-values**  
16  
17 410 **<0.05 were considered statistically significant.**

18  
19  
20 411

21  
22 412 **Figure 2. Circulating levels of MMP-9 and TIMP-1, and TIMP-1/MMP-9 ratios in**  
23  
24 413 **Surinamese newborns. A: Matrix metalloproteinase-9 (MMP-9); B: Tissue inhibitor of**  
25  
26 414 **metalloproteinase (TIMP-1); C: TIMP-1/MMP-9 ratios. Bars represent median values and**  
27  
28 415 **error bars 95% confidence intervals. P-values <0.05 were considered statistically significant.**

29  
30  
31 416

32  
33 417 **Figure 3. Circulating levels of neutrophil elastase in Surinamese newborns. Bars**  
34  
35 418 **represent median values and error bars 95% confidence intervals. P-values <0.05 were**  
36  
37 419 **considered statistically significant.**

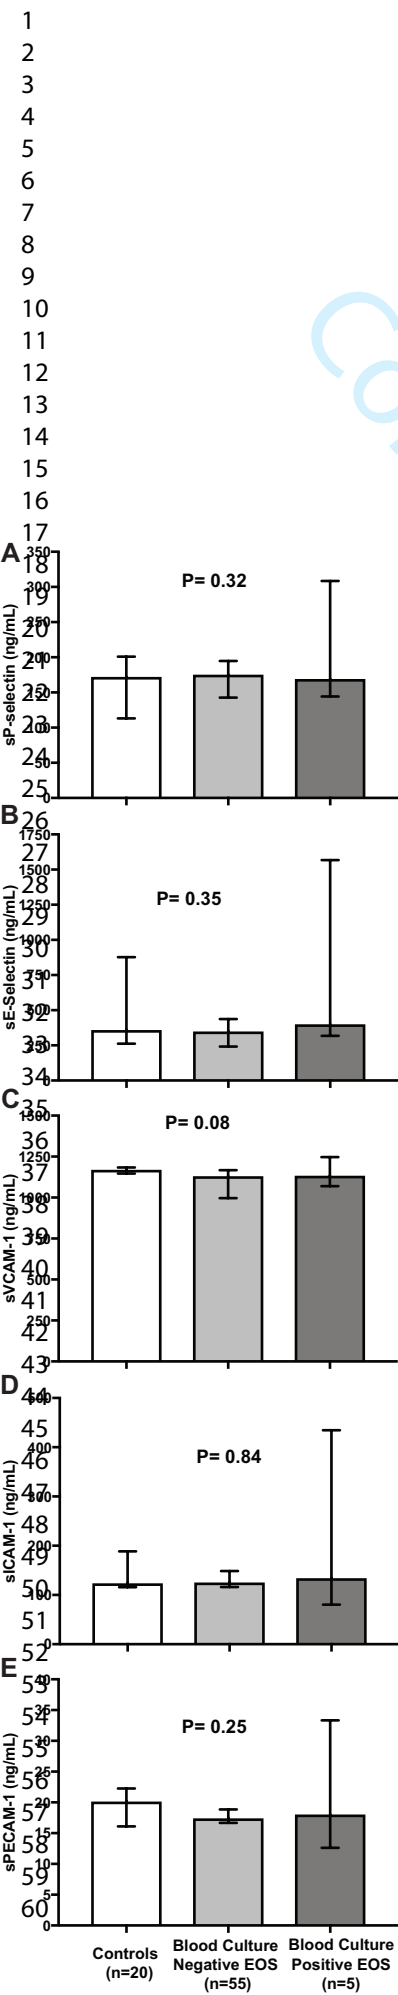

Confidential: For Review Only

1  
2  
3  
4  
5  
6  
7  
8  
9  
10  
11  
12  
13  
14  
15  
16  
17  
18  
19  
20  
21  
22  
23  
24  
25  
26  
27  
28  
29  
30  
31  
32  
33  
34

Confidential: For Review Only

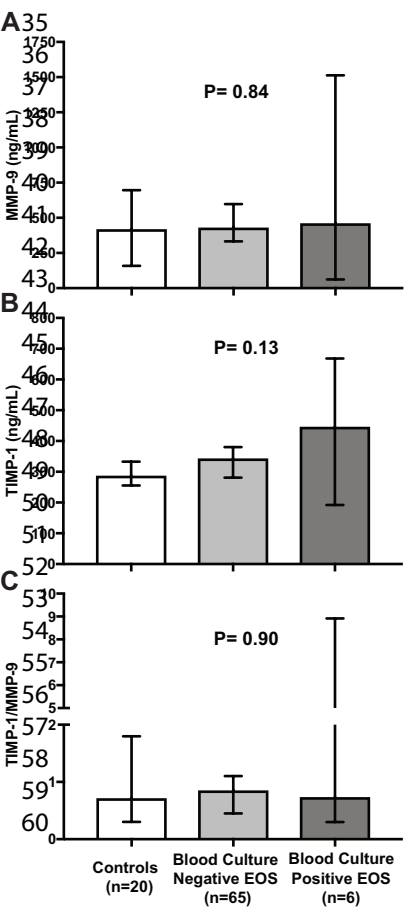



Confidential: For Review Only

1  
2  
3  
4  
5  
6  
7  
8  
9  
10  
11  
12  
13  
14  
15  
16  
17  
18  
19  
20  
21  
22  
23  
24  
25  
26  
27  
28  
29  
30  
31  
32  
33  
34  
35  
36  
37  
38  
39  
40  
41  
42  
43  
44  
45  
46  
47  
48  
49  
50  
51  
52

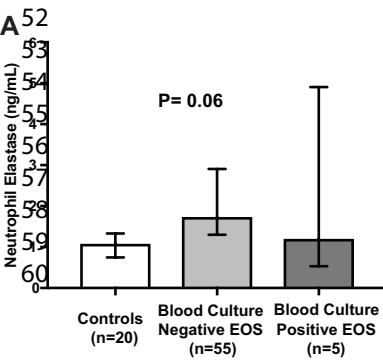

**Supplemental Table 2: Studies reporting levels of endothelial cell adhesion molecules and shedding enzymes in newborns**

| Study (ref.), year            | CAM or shedding enzyme         | Cohort Characteristics | Gestational age (weeks) | Postnatal age  | Main Results                                          | Analysis Method         | Healthy (ng/mL) <sup>1</sup>                                                   | Septic (ng/mL) <sup>1</sup>                                                      |
|-------------------------------|--------------------------------|------------------------|-------------------------|----------------|-------------------------------------------------------|-------------------------|--------------------------------------------------------------------------------|----------------------------------------------------------------------------------|
| Fatah et al. (16), 2017       | sE-selectin                    | EOS and LOS            | NS                      | NS             | sE-selectin <b>elevated</b> in BCPS                   | ELISA                   | 148.9 ± 7.9                                                                    | 177.1 ± 3.5                                                                      |
| Weitkamp et al. (17), 2016    | MMP-9                          | EOS and LOS            | 25-36                   | < and ≥ 3 days | MMP-9 levels <b>lower</b> in BCPS                     | Multiplex bead assay    | NS                                                                             | NS                                                                               |
| Wynn et al. (18), 2015        | MMP-9                          | Chorioamnionitis       | 25-36                   | NS             | MMP-9 levels <b>lower</b> in chorioamnionitis         | Multiplex bead assay    | NS                                                                             | NS                                                                               |
| Sugitharini et al. (19), 2013 | sICAM-1, NE                    | EOS                    | 34-42                   | 0-72 hours     | sICAM-1 and NE <b>elevated</b> in EOS                 | ELISA<br>Antibody array | sICAM-1/<br>NE: NS                                                             | sICAM-1: NS<br>NE: 499.2 ± 22.0                                                  |
| Edgar et al. (20), 2010       | sICAM-1, sE-selectin           | EOS and LOS            | 24-41                   | NS             | sICAM-1 and sE-selectin <b>elevated</b>               | ELISA                   | sICAM-1: 165 (130-290)<br>sE-selectin: 71 (51-118)                             | sICAM-1: 405 (252-666)<br>sE-selectin 158 (94-207)                               |
| Fukanaga et al. (21), 2009    | MMP, TIMP-1                    | Uninfected newborns    | <30                     | Cord blood     | No difference                                         | ELISA                   | MMP-9: 22 (16-48)<br>TIMP-1: 122 (86-249)                                      | NS                                                                               |
| Sunagawa et al. (22), 2009    | MMP-9, TIMP-1                  | Uninfected newborns    | 35-41                   | 1-2 days       | NA                                                    | ELISA                   | NS                                                                             | NA                                                                               |
| Figueras et al. (23), 2007    | sICAM-1, sVCAM-1, sP-selectin, | EOS and LOS            | 32-40                   | 1-32 days      | sICAM-1 and sVCAM-1 <b>increased</b> over time.       | ELISA                   | sICAM-1: 156 (150-194)<br>sVCAM-1: 856 (742-960)<br>sP-selectin: 272 (152-288) | sICAM-1: 394 (342-600)<br>sVCAM-1: 1153 (726-1307)<br>sP-selectin: 244 (170-324) |
| Sitaru et al. (24), 2005      | sP-selectin                    | Chorioamnionitis       | 25-40                   | Cord blood     | sP-selectin <b>elevated</b> in chorioamnionitis       | ELISA                   | 104 ± 71                                                                       | 222 ± 128                                                                        |
| Schulz et al. (25), 2004      | MMP-9, TIMP-1                  | Uninfected newborns    | 25-40                   | 1-28 days      | MMP-9 highest in preterm<br>TIMP-1 highest in at term | ELISA                   | NS                                                                             | NA                                                                               |
| Edgar et al.                  | sICAM-1                        | EOS and LOS            | 24-42                   | NS             | sICAM-1 <b>elevated</b> in                            | ELISA                   | 205 (146-343)                                                                  | 406 (345-1180)                                                                   |

|                             |                               |                        |         |             |                                                                 |       |                                                                                                   |                                                               |
|-----------------------------|-------------------------------|------------------------|---------|-------------|-----------------------------------------------------------------|-------|---------------------------------------------------------------------------------------------------|---------------------------------------------------------------|
| (26), 2002                  |                               |                        |         |             | BCPS                                                            |       |                                                                                                   |                                                               |
| Apostolou et al. (27), 2002 | sICAM-1                       | EOS and LOS            | 25-42   | NS          | sICAM-1 <b>elevated</b> in BCPS                                 | ELISA | 358.4 ± 28.9                                                                                      | 710.7 ± 56.6                                                  |
| Dollner et al. (28), 2001   | sICAM-1, sE-selectin          | EOS and LOS            | 30-42   | 1-7 days    | sICAM-1 and sE-selectin <b>elevated</b> in BCPS                 | ELISA | sICAM-1: 244.0 (92.5-500)<br>sE-selectin: 91.4 (<2.0-217.8)                                       | sICAM-1: 357.4 (141.6-500)<br>sE-selectin: 151.7 (37.0-362.2) |
| Malamitsi et al. (29), 2000 | sVCAM-1, sPECAM-1             | Uninfected newborns    | 37-40   | 1-5 days    | No change between day 1 and 5                                   | ELISA | sVCAM-1: 1340 ± 58.3<br>sPECAM-1: 17.5 ± 0.7                                                      | NA                                                            |
| Giannaki et al. (30), 2000  | sE-selectin                   | Uninfected newborns    | At term | 1-5 days    | sE-selectin <b>decreases</b> between day 1 and 5                | ELISA | 139 ± 48                                                                                          | NA                                                            |
| Giannaki et al. (31), 1999  | sICAM-1, sVCAM-1              | Uninfected newborns    | At term | 1-5 days    | sICAM-1 and sVCAM-1 <b>increase</b> between day 1 and 5         | ELISA | sICAM: 179 ± 56.1<br>sVCAM-1: 1125.0 ± 281.0                                                      | NA                                                            |
| Phocas et al. (32), 1998    | sICAM-1                       | Uninfected newborns    | 35-42   | 1-30 days   | sICAM-1 <b>increases</b> between day 1, 5 and 30                | ELISA | 137.3 ± 62.0                                                                                      | NA                                                            |
| Berner et al. (33), 1998    | sICAM-1                       | EOS                    | 26-42   | 0-96 hours  | sICAM-1 <b>lower</b> in EOS. sICAM-1 <b>increases</b> over time | ELISA | 421 (291-459)                                                                                     | 446 (171-534)                                                 |
| Austgulen et al. (34), 1997 | sICAM-1, sVCAM-1, sE-selectin | EOS and LOS, pneumonia | 24-42   | 0-162 hours | sE-selectin and sICAM-1 <b>elevated</b> in infected neonates    | ELISA | sE-selectin: 84.2 (21.6-231.3)<br>sICAM-1: 2131.3 (1449.5-3500.0)<br>sVCAM-1: 237.0 (122.0-500.0) | NS                                                            |

CAM = endothelial cell adhesion molecule; sVCAM-1 = soluble Vascular Cell Adhesion Molecule-1; sICAM-1 = soluble Intercellular Adhesion Molecule-1; NE = neutrophil elastase NA = Not available; NS = Not specified; EOS = Early Onset Sepsis; LOS = Late Onset Sepsis; BCPS = Blood Culture Positive Sepsis.

<sup>a</sup> Levels are in mean ± SD, mean ± SEM, median (interquartile range), or median (range).
